# Supplementary material for: Development of an in Silico Model of DPPH• Free Radical Scavenging Capacity: Prediction of Antioxidant Activity of Coumarin Type Compounds
Source: Int J Mol Sci. 2016 Jun 7;17(6):881. doi: 10.3390/ijms17060881 (PMC4926415; doi:10.3390/ijms17060881)
Supplement: Supplementary file 1 [file ijms-17-00881-s001.xlsx]

## Sheet: Table S1
Table S1. Experimental literature value (pIC50), values predicted by the MLP 14-9-1 (pIC50 predicted), standardized residues (pIC50- Std.Res).
Molecule (PubChem CID)	pIC50	pIC50 predicted	pIC50- Std.Res
CID 10029906	4.2757	4.52032	0.55639
CID 10030540	4.1694	3.80281	-0.8338
CID 10072723	4.1612	4.26356	0.23282
CID 10082261	4.8477	4.15575	-1.57381
CID 10150350	4.0501	4.04577	-0.00985
CID 10178463	3.8477	4.38814	1.22922
CID 10193699	4.5229	4.60768	0.19284
CID 10215268	4.0788	4.12204	0.09835
CID 10215621	4.1805	4.00959	-0.38874
CID 10221179	4.2487	4.74147	1.12079
CID 10264116	4.6234	4.37257	-0.57051
CID 10328286	5.0969	4.85886	-0.5414
CID 10339712	4	4.79118	1.79953
CID 10346004	4.6968	4.37946	-0.72178
CID 10348496	4.1215	4.09018	-0.07124
CID 10350153	4.6234	4.6207	-0.00615
CID 10365840	3.301	3.86954	1.29313
CID 10370732	4.0701	3.89184	-0.40544
CID 10377204	3.7825	3.48774	-0.67043
CID 10385745	3.9578	3.82399	-0.30435
CID 10387631	4.8861	4.80004	-0.19574
CID 10402927	4.4449	4.69101	0.55977
CID 10414856	3.3979	4.26589	1.97422
CID 10423558	5.1079	4.80914	-0.67952
CID 10425731	4.5086	4.16153	-0.7894
CID 10433425	4.0953	4.31454	0.49865
CID 10435297	4.3565	4.40569	0.11189
CID 10436	6.0969	5.05135	-2.37808
CID 10450920	4.8871	4.77194	-0.26192
CID 10456516	5.0269	4.754	-0.62071
CID 10458989	4.1096	4.36304	0.57645
CID 10480940	4.7296	4.46612	-0.59929
CID 1057	4.4225	4.65714	0.53369
CID 10810596	3.04	3.94103	2.04937
CID 10810597	3.0462	3.87322	1.88103
CID 10819104	3.4089	3.60635	0.4491
CID 10858	3	3.81856	1.8618
CID 10873461	4.5229	3.954	-1.29396
CID 10906376	3.8013	4.16982	0.83818
CID 10907594	3.9031	4.27279	0.84086
CID 10929258	4.6289	4.54374	-0.1937
CID 10947808	4.4685	4.45059	-0.04074
CID 10951440	4.8894	4.50879	-0.86569
CID 11005695	4.301	4.35043	0.11244
CID 11005957	4.1805	4.45904	0.63353
CID 1101245	5.1385	4.94201	-0.44692
CID 11015261	4.5229	3.95151	-1.29962
CID 11035383	5.2924	5.1375	-0.35231
CID 11039407	4.2596	4.14283	-0.26558
CID 11042199	4.2034	3.90255	-0.68427
CID 11077195	4.2441	4.32583	0.1859
CID 11103410	4.4815	4.48229	0.00179
CID 11114773	4	4.14681	0.33392
CID 11116966	4.6478	4.56215	-0.19481
CID 11134199	3.699	3.76362	0.14698
CID 11135781	4.8761	4.29736	-1.31633
CID 11153672	4.6716	4.57697	-0.21524
CID 11181364	4.8182	4.41791	-0.91044
CID 11188197	3.4413	3.3177	-0.28113
CID 11203960	4.5229	3.90945	-1.39527
CID 11224109	3.2041	3.23561	0.07167
CID 11236329	4.4123	4.29519	-0.26637
CID 11247668	4.699	4.7096	0.02412
CID 11284880	4.1938	4.30181	0.24566
CID 11330069	3.301	3.56289	0.59566
CID 11365276	4.7493	4.51988	-0.52181
CID 11365823	4.9431	4.38376	-1.27221
CID 11381926	4.223	3.9396	-0.64458
CID 11383736	4.8097	4.9639	0.35072
CID 11391937	4.8601	4.38929	-1.07085
CID 11398079	4.4815	4.22546	-0.58236
CID 11398272	3.4202	3.61409	0.441
CID 11426529	4.6038	4.36013	-0.55421
CID 11432381	3.7122	3.69619	-0.03641
CID 11433035	4.5943	4.54946	-0.102
CID 11435579	2.9031	3.17972	0.62916
CID 11442705	4.4685	4.24532	-0.50762
CID 11443924	4.2588	4.02029	-0.54249
CID 11466771	3.2226	4.01494	1.80217
CID 11476782	4.0223	4.3436	0.73079
CID 11501	4.1321	3.98212	-0.34112
CID 115252	3.2449	3.76247	1.1772
CID 11564573	4.9281	4.75402	-0.39594
CID 11588549	4	3.71038	-0.65873
CID 11611248	4.7595	4.32532	-0.98754
CID 11654279	4.8861	4.79472	-0.20785
CID 11655574	4.4318	4.46335	0.07177
CID 11673743	3.5376	3.92065	0.87123
CID 11682371	4.9747	4.30948	-1.51302
CID 11704704	4.9208	4.8484	-0.16468
CID 11719580	4.7447	4.6878	-0.12942
CID 11724114	4.6716	4.32424	-0.79006
CID 11752938	3.301	3.22824	-0.16548
CID 11758702	3.4921	4.01075	1.17966
CID 11771413	5.5086	4.5455	-2.19056
CID 11775863	4.2218	4.22642	0.01052
CID 11780726	4.6647	4.72212	0.13059
CID 11808877	4.3372	4.72055	0.87192
CID 11968471	3.9355	3.95642	0.04758
CID 1203	5	4.7619	-0.54154
CID 1205040	5.5452	5.22935	-0.7184
CID 12239518	3.3312	4.00514	1.53287
CID 12315415	3	4.20963	2.75127
CID 12329610	3.699	3.53816	-0.36583
CID 12396823	5.3979	4.61491	-1.7809
CID 12396824	4	4.60258	1.37055
CID 124886	4.0177	4.1324	0.26087
CID 12662957	3.4546	3.80287	0.79212
CID 126887	4.7852	4.57963	-0.46758
CID 12693700	4.6684	4.72886	0.13751
CID 1276528	4.9219	4.76321	-0.36093
CID 1281690	4.8377	4.62369	-0.48676
CID 12855	3.699	3.34531	-0.80446
CID 128889	4.5229	4.84265	0.72726
CID 12986066	5.6498	4.62355	-2.33418
CID 130976	4.753	4.76853	0.03531
CID 13250466	4.2218	4.21824	-0.00809
CID 13254473	4.1986	4.21663	0.04101
CID 13508053	3.8444	4.00008	0.35408
CID 13508055	4.5186	3.84657	-1.52852
CID 13508060	4.2426	4.22188	-0.04713
CID 13508061	4.3098	4.36857	0.13367
CID 13567735	3.637	3.96576	0.74775
CID 13760716	4.4342	4.01817	-0.94625
CID 13857929	4.2218	4.08277	-0.31622
CID 13857937	4.8239	4.47822	-0.78623
CID 13888133	4.6861	4.63643	-0.11298
CID 13919535	3.301	3.82986	1.20287
CID 13962928	4.3344	3.88348	-1.0256
CID 13995449	4.6925	4.44659	-0.55931
CID 14034194	4.7825	4.66838	-0.25956
CID 14079440	4	4.08304	0.18888
CID 14237599	5.0223	4.3647	-1.4957
CID 14332450	4.1669	4.36786	0.45709
CID 14353469	4.6615	4.51265	-0.33856
CID 14407195	5.0362	4.51477	-1.18598
CID 14454290	4.0757	3.90012	-0.39936
CID 14467636	4.2007	4.44935	0.56556
CID 14467638	4.2596	4.42185	0.36904
CID 14467641	3.9547	4.05854	0.23617
CID 14578495	5.0132	5.11733	0.23684
CID 14840962	4.6596	4.22368	-0.99149
CID 14887605	4.2351	4.43145	0.44659
CID 149806	4.5452	4.43896	-0.24164
CID 14985	4.3615	4.25918	-0.23272
CID 15126652	5.2449	4.53366	-1.61769
CID 15307521	3.699	4.30813	1.38545
CID 1550234	3.4994	4.39823	2.04437
CID 1551384	4	3.93746	-0.14223
CID 1551387	4	3.78435	-0.4905
CID 15556234	5.4202	4.88035	-1.22787
CID 15956	3.0041	3.66762	1.50917
CID 16040016	4.5376	4.54615	0.01944
CID 16079989	4.308	4.5308	0.50675
CID 16083179	4.289	4.89881	1.387
CID 16091685	5.2125	3.91628	-2.94822
CID 16104871	3.699	4.4107	1.61874
CID 16104872	4.6778	4.50806	-0.38606
CID 16119668	4.2132	4.6051	0.89136
CID 161336	4.2518	4.06598	-0.42264
CID 16216400	3.6968	3.91093	0.48702
CID 16216402	4.3468	4.00018	-0.78837
CID 16216594	4.5719	4.64416	0.16435
CID 16655435	4.0726	3.87208	-0.45607
CID 16757395	4.7328	4.25549	-1.08564
CID 16757396	4.9788	4.95185	-0.0613
CID 16757398	4.6198	4.50555	-0.25986
CID 16896284	4	3.70346	-0.67447
CID 1714173	4	3.77275	-0.51688
CID 1716231	3.1701	3.85649	1.56117
CID 17391248	4	4.51592	1.17344
CID 17574027	3.3571	3.80421	1.01694
CID 17586047	3.2103	3.39452	0.419
CID 17621068	4.1947	4.38286	0.42796
CID 1794427	4.342	4.62221	0.63733
CID 18100	4.4461	4.66738	0.50329
CID 185617	4.5722	4.37081	-0.45805
CID 185766	4.9586	4.31863	-1.4556
CID 188287	5.8539	4.93919	-2.08048
CID 1909086	3.301	4.4702	2.65932
CID 1935	3	3.70457	1.60253
CID 19578261	4	3.60647	-0.89508
CID 20055968	4	4.53869	1.22523
CID 20396990	4.0757	4.16428	0.20147
CID 21104932	4.8539	4.27075	-1.32636
CID 2141	4	4.08048	0.18306
CID 21575482	4	4.25798	0.58678
CID 21577856	4.2154	4.28148	0.1503
CID 21586651	4.2924	3.73607	-1.26535
CID 21589503	4.486	4.61219	0.28701
CID 21599888	4.0132	4.39714	0.87325
CID 21606617	4	4.10459	0.23788
CID 21676383	5.6021	4.51429	-2.4742
CID 21722016	4.3809	4.83851	1.04083
CID 21778115	5.0915	4.55291	-1.22501
CID 219800	4.5171	4.02796	-1.11254
CID 219809	4.4962	4.02725	-1.06662
CID 2202	4.2218	4.54647	0.73846
CID 22833196	4.821	4.15026	-1.52557
CID 22909786	3.7481	4.32124	1.3036
CID 231320	3.7385	3.49915	-0.5444
CID 23250007	5.4763	4.67459	-1.82347
CID 23329295	3.4412	3.88572	1.01105
CID 23426771	5.0706	4.72995	-0.7748
CID 23509264	3.9598	4.09378	0.30473
CID 23634522	4.1249	4.07699	-0.10896
CID 23655345	4.1024	4.21109	0.24722
CID 23655528	4.0555	4.10001	0.10124
CID 23655530	4.0044	4.39169	0.88089
CID 23655531	3.9914	3.92634	-0.14797
CID 23655532	3.2055	3.73326	1.20039
CID 23655737	4.1024	4.09579	-0.01503
CID 23655738	4.0655	3.93419	-0.29867
CID 23655739	4.1024	4.26282	0.36488
CID 23661682	3.699	4.28937	1.34278
CID 23797809	5.7799	5.59899	-0.41147
CID 23798784	3.0255	3.30793	0.64238
CID 23844069	3.5258	4.08986	1.28294
CID 24148517	4.9355	4.79979	-0.30867
CID 24180539	5.109	4.80272	-0.69663
CID 246558	4.505	4.47799	-0.06143
CID 24761035	5.3872	4.67244	-1.62571
CID 24761045	5.0915	5.02764	-0.14526
CID 24762916	5.1739	4.33399	-1.91035
CID 24770033	5.1675	4.91053	-0.58447
CID 24770502	5.3665	4.74427	-1.41525
CID 24770504	5.3565	4.63765	-1.635
CID 24770505	5.2076	4.54188	-1.51417
CID 24770506	5.3872	4.79695	-1.3425
CID 24770577	5.585	4.92838	-1.49346
CID 24770578	5.0706	4.98895	-0.1857
CID 24816381	4.821	4.42858	-0.89254
CID 24828114	4.8928	4.57955	-0.71249
CID 24850196	4.2573	4.41062	0.34873
CID 24862577	3.5357	4.34049	1.83048
CID 24879405	4.8239	4.08129	-1.68904
CID 24879406	4.9355	4.28629	-1.47661
CID 24879475	4.9788	4.27747	-1.59515
CID 24895134	4.2798	4.40029	0.27405
CID 24895199	4.2741	4.41156	0.31266
CID 24939263	3.3354	3.49063	0.35307
CID 24987042	4.5662	4.47982	-0.19647
CID 25010554	3.9427	3.82774	-0.26148
CID 25104522	4.9208	4.63963	-0.63951
CID 25113729	4.3098	3.94501	-0.82972
CID 25157858	4.4976	4.26315	-0.53326
CID 25157861	4.4609	4.21406	-0.56144
CID 25157862	4.4522	4.2368	-0.48992
CID 25157863	4.5302	4.35151	-0.40643
CID 2519	4	4.45652	1.03834
CID 25194979	3.7339	3.3099	-0.96437
CID 25213354	4.3199	4.35865	0.08814
CID 25213355	3.893	4.43633	1.23579
CID 25213356	4.1612	4.51645	0.808
CID 25213357	3.8975	4.31877	0.95817
CID 25213358	3.699	4.44103	1.68772
CID 25213588	4.3606	4.53251	0.391
CID 25213589	3.699	4.02094	0.73225
CID 25266037	4.3585	3.93125	-0.97178
CID 255057	3.7289	3.2196	-1.15839
CID 259632	4.2411	4.43673	0.44495
CID 262164	3	3.95456	2.17113
CID 270039	4.6821	4.3193	-0.82519
CID 2733208	3.9101	3.9501	0.09098
CID 2754024	3.0885	3.20159	0.25722
CID 2764	3.699	3.82113	0.27777
CID 2787704	4.6326	3.63772	-2.26283
CID 2828680	3.3126	3.27384	-0.08815
CID 2838890	3.2906	3.26197	-0.06512
CID 2839009	3.1311	3.36131	0.52361
CID 2839135	3.6429	3.55439	-0.20132
CID 289	4.4437	4.585	0.32138
CID 3008868	5.082	5.14824	0.15065
CID 3084296	3.4841	3.55619	0.16398
CID 3086528	3.699	3.98438	0.6491
CID 31404	4.1818	4.28445	0.23348
CID 31553	3.5467	3.42882	-0.26812
CID 3314	4.5607	4.51703	-0.09932
CID 3355050	3.6153	3.90937	0.66885
CID 345686	3.699	3.85534	0.35559
CID 370	4.4957	5.07244	1.31177
CID 3802178	4.0584	3.77557	-0.64328
CID 3831191	4.62	3.62015	-2.27414
CID 3840	4.1586	4.73516	1.31138
CID 3928772	2.3979	3.59281	2.7178
CID 4004523	3.969	4.11217	0.32563
CID 4021	4.5505	3.92864	-1.4144
CID 402956	4.4992	4.56952	0.15993
CID 407032	4.2218	3.88662	-0.76235
CID 4161478	3	3.79872	1.81668
CID 4237287	4.0585	4.11271	0.1233
CID 42638803	3.1784	3.8167	1.4518
CID 42638804	3.313	4.30513	2.25657
CID 42638805	3.1361	3.86227	1.65166
CID 42638806	3.9876	3.55722	-0.9789
CID 42639496	3.6256	4.3101	1.55688
CID 42639502	3.5511	4.41936	1.97483
CID 436659	4.2218	4.22096	-0.00192
CID 43797805	3.6383	3.06081	-1.31348
CID 44093	4.3665	4.09374	-0.62038
CID 440991	4.1785	4.58398	0.92226
CID 44138908	3.699	4.0925	0.89501
CID 44138909	3.699	4.52596	1.88091
CID 44138910	3.8509	4.11747	0.60631
CID 44139044	3.699	4.29248	1.34985
CID 442009	3.9431	4.14807	0.4662
CID 44230016	4.821	4.39586	-0.96697
CID 44241592	4.5907	4.76147	0.38841
CID 442510	3.2132	3.75509	1.23251
CID 442675	5.2924	4.49666	-1.80988
CID 44321330	3.5229	4.27963	1.72117
CID 44321706	4.0851	4.2231	0.31387
CID 44321707	3.7913	4.35739	1.28755
CID 44321708	3.5229	4.16992	1.47163
CID 44361591	4.1512	4.79685	1.46851
CID 44390839	4.7222	4.27144	-1.02524
CID 44390895	4.8111	5.14063	0.74952
CID 44399283	4.6635	4.37483	-0.65657
CID 44399287	3.9263	4.30529	0.862
CID 44399367	4.6055	4.0661	-1.22686
CID 44399373	3.6698	4.25404	1.32884
CID 44399392	4.1778	4.00481	-0.39346
CID 44399410	4.3675	4.02376	-0.78183
CID 44399510	4.0926	3.95595	-0.31081
CID 44399514	3.9809	4.19624	0.48979
CID 44399572	4.3969	4.35973	-0.08454
CID 44405862	3.699	4.41237	1.62254
CID 44405880	3.699	4.41488	1.62825
CID 44410484	4	4.2551	0.58023
CID 44410486	4	4.10818	0.24604
CID 44418770	4.3947	4.62465	0.52301
CID 44419312	4	4.635	1.4443
CID 44421292	3.8794	4.11291	0.53111
CID 44421293	4.2596	4.08147	-0.40514
CID 44421295	3.8327	3.96591	0.30298
CID 44423083	4.5229	3.98978	-1.21257
CID 44423248	5.0088	4.82576	-0.41631
CID 44423249	4.8794	3.95277	-2.10759
CID 44423250	4.6038	4.295	-0.70235
CID 44423602	3.8489	4.19338	0.78352
CID 44425453	4.7474	4.85852	0.25273
CID 44425454	5.3893	5.17551	-0.48625
CID 44425455	5.0088	4.71726	-0.66311
CID 44425458	4.7552	4.92778	0.39254
CID 44425459	4.4931	4.77062	0.63122
CID 44427222	3.699	3.58647	-0.25595
CID 44429050	4.2774	4.505	0.51766
CID 44429837	4.7533	4.34684	-0.92447
CID 44432251	5.0809	4.54369	-1.22187
CID 44437163	4.6596	4.73538	0.17235
CID 44437164	5.0146	4.86619	-0.33755
CID 44437165	4.7929	4.12421	-1.52092
CID 44437166	4.7069	4.60533	-0.23101
CID 44443271	4.512	4.31226	-0.45432
CID 44443273	4.6144	4.21829	-0.90093
CID 44443275	4.5945	4.31995	-0.62446
CID 44443280	4	4.27186	0.61834
CID 44445553	4.0088	3.99896	-0.02239
CID 44445554	2.9987	3.66402	1.51326
CID 44445556	4.2218	3.9679	-0.5775
CID 44445800	5.3665	4.83525	-1.20832
CID 44447175	4.1367	3.83108	-0.69512
CID 44447177	3.7525	3.83631	0.19062
CID 44452395	4.2596	4.64252	0.87094
CID 44452398	4.5229	4.61537	0.21032
CID 44452425	4.585	4.55149	-0.07622
CID 44452645	3.2182	3.35278	0.30611
CID 44452647	3.567	3.5426	-0.05549
CID 44452667	3	3.38075	0.866
CID 44452668	3.567	3.54383	-0.05271
CID 44452689	3	3.30233	0.68764
CID 44478418	3.301	4.24681	2.15121
CID 44478682	3.301	4.24087	2.13772
CID 44511362	3.3768	3.56773	0.43426
CID 44512371	4.5158	4.24982	-0.60496
CID 44514059	5.0605	4.33574	-1.64845
CID 445154	4.1403	4.71483	1.30677
CID 44558989	4.7033	4.51836	-0.42063
CID 44559222	4.9208	4.58719	-0.7588
CID 44559252	3.6308	4.10983	1.08955
CID 44559633	4.2933	4.18129	-0.25476
CID 44560003	4.9788	4.34826	-1.43414
CID 44566939	4.5126	4.56957	0.12957
CID 44567286	4.2612	3.92625	-0.76182
CID 44567287	4.3497	3.86436	-1.1039
CID 44567617	4.5719	4.17837	-0.89507
CID 44567621	4.2314	3.93143	-0.68227
CID 44567622	3.9097	4.88763	2.22429
CID 44575069	4.4449	4.62214	0.40313
CID 44575382	4.7721	4.465	-0.69849
CID 44575383	4.5229	3.93112	-1.34598
CID 44575409	3.2857	3.06903	-0.49281
CID 44575735	3.585	3.63499	0.1137
CID 44575749	4.7375	4.24146	-1.12824
CID 44575752	4.327	4.06398	-0.59824
CID 44577121	3.5467	3.91592	0.83979
CID 44583433	3.2757	3.25509	-0.04689
CID 44583461	3.2924	3.74049	1.01917
CID 44583938	4.3399	4.31676	-0.05262
CID 44583939	3.9037	4.50755	1.37345
CID 44583980	4.5229	3.56652	-2.17527
CID 44583983	4.5229	3.92516	-1.35956
CID 44585556	4.3019	4.08863	-0.48507
CID 445858	4.2497	4.24438	-0.01211
CID 44590821	4.8321	5.14496	0.71159
CID 44593352	4	4.1877	0.42691
CID 44594138	5.4685	4.71906	-1.70458
CID 44632495	4.0747	4.69227	1.40465
CID 44634400	3.8831	4.19919	0.71895
CID 44715189	4.9431	4.43311	-1.15996
CID 44715357	5.1024	4.65346	-1.02111
CID 45101466	3.838	3.80221	-0.0814
CID 45101503	3.5229	3.59416	0.16207
CID 45101504	4.9586	4.58401	-0.852
CID 45267451	3.301	3.6068	0.69554
CID 45267461	3.301	3.50251	0.45833
CID 45267464	3.301	3.73541	0.98806
CID 45268302	3.301	3.595	0.66869
CID 45269176	3.301	3.45108	0.34137
CID 45269193	3.301	3.37792	0.17495
CID 45269663	3.699	3.74432	0.10307
CID 45269664	3.699	3.74359	0.10141
CID 45269748	3.5624	4.41111	1.93036
CID 45269965	4.1196	4.4436	0.73694
CID 45270503	3.699	3.4699	-0.52109
CID 45271625	5.5969	4.70152	-2.03653
CID 45271708	3.301	3.90859	1.38194
CID 45271723	3.301	3.36007	0.13435
CID 45272288	3.806	4.31455	1.15668
CID 45481544	4.5031	4.11433	-0.88426
CID 45481546	4.382	4.14114	-0.54783
CID 45484290	2.8539	3.86574	2.3014
CID 45484392	3.9586	3.91646	-0.09585
CID 45486328	4.4015	4.22927	-0.39172
CID 45486330	4.3404	4.11045	-0.52301
CID 46182908	3	4.31995	3.00219
CID 46184559	4.4248	4.09911	-0.74078
CID 46223916	5.0757	4.13344	-2.14315
CID 46227124	3.5229	3.87111	0.792
CID 46227125	3.5229	3.77094	0.56417
CID 46227137	3.5229	3.75392	0.52545
CID 46227138	3.5229	3.91395	0.88943
CID 46227139	4.4168	4.62391	0.47108
CID 46227181	3.5229	3.59738	0.16941
CID 46227186	3.5229	3.87916	0.8103
CID 46230189	3.699	3.82789	0.29315
CID 46704104	4.0888	3.88161	-0.47124
CID 467296	4.9666	4.63907	-0.74495
CID 46853900	4.2218	4.24306	0.04835
CID 46853901	4.2218	3.92153	-0.68297
CID 46853902	5.1135	4.26679	-1.92583
CID 46853904	4.2218	4.21553	-0.01427
CID 46853907	4.2218	4.3624	0.31979
CID 46853908	4.2218	4.26323	0.09423
CID 46854056	4.2218	4.20498	-0.03825
CID 46854057	4.2218	4.18129	-0.09213
CID 46856146	5.4089	4.49714	-2.07377
CID 46856147	4.2218	4.06475	-0.3572
CID 46856148	4.2218	4.45847	0.53831
CID 46856154	4.2218	4.29034	0.1559
CID 46886871	4.4559	4.20603	-0.56833
CID 46890011	3.7567	3.65206	-0.23801
CID 46911009	4.0991	4.2057	0.24245
CID 46911010	4.057	4.13254	0.17182
CID 46918734	4.301	3.89714	-0.91857
CID 46918735	4.301	4.16388	-0.31188
CID 46919224	4.4078	3.64255	-1.74055
CID 47576	3.4895	3.57887	0.20327
CID 484754	4.1314	3.81982	-0.70869
CID 484757	3.7817	3.92406	0.3238
CID 4912	4.2785	4.44734	0.38401
CID 4947	4.4245	4.49593	0.16246
CID 49796926	4.9702	4.23467	-1.67295
CID 49798007	4.0168	4.5799	1.28076
CID 49798009	4.0585	4.40353	0.78477
CID 49798010	4.0531	4.34673	0.66785
CID 49798011	3.7857	4.2286	1.00737
CID 49798034	3.9893	4.90369	2.07976
CID 49798035	3.9473	4.11807	0.38841
CID 49798037	3.6936	4.22532	1.2094
CID 49800189	4.1649	3.81575	-0.79414
CID 49837277	4.3036	4.27125	-0.07359
CID 49837278	4.2449	4.23524	-0.02198
CID 49837279	4.2874	4.44458	0.3575
CID 49837381	4.2111	4.5317	0.72921
CID 49837382	4.1993	4.37399	0.39733
CID 49840039	5.3979	4.72671	-1.52661
CID 49840041	4	4.87225	1.98391
CID 49840042	5.3468	4.88015	-1.06138
CID 49840043	5.041	4.86976	-0.38949
CID 49862872	4.2218	3.72379	-1.13271
CID 49863288	5.1192	4.28153	-1.90525
CID 49866356	4.2041	4.19751	-0.015
CID 49866357	4.0017	3.87711	-0.28337
CID 49866360	4	4.11628	0.26449
CID 50899162	4.0655	4.38585	0.72862
CID 50899163	4.2596	4.42442	0.37488
CID 50899852	4.4166	4.25078	-0.37716
CID 50899867	3.699	3.68872	-0.02339
CID 50901250	3.699	3.60689	-0.2095
CID 50901252	3.699	3.78277	0.19052
CID 50908786	3.699	3.54859	-0.34211
CID 51040210	4.1124	3.82187	-0.6608
CID 513197	4.4508	4.32472	-0.28676
CID 51991	4.2218	3.88564	-0.7646
CID 5213	2.6778	3.33324	1.49079
CID 5274585	4.3893	4.75758	0.83764
CID 5276405	5.1238	4.82945	-0.66948
CID 5280343	4.4646	4.89409	0.97687
CID 5280445	4.983	4.75135	-0.52689
CID 5280805	4.9087	4.62118	-0.65395
CID 5280863	4.0472	4.74051	1.57691
CID 5281426	3.3979	4.422	2.32929
CID 5281600	3.7352	4.36986	1.44353
CID 5281607	4	4.00958	0.0218
CID 5281703	4	4.52458	1.19315
CID 5281708	3	4.00718	2.29081
CID 5281712	4.5171	4.68502	0.38194
CID 5281718	3.7011	4.45542	1.71568
CID 5281773	4.6778	4.54625	-0.2992
CID 5281787	4.9172	4.50935	-0.92764
CID 5282102	4	4.63071	1.43453
CID 5282149	4	4.61305	1.39436
CID 5284649	4.4868	4.50555	0.04264
CID 52918154	5.0991	4.98418	-0.26139
CID 52918156	4.8462	4.87335	0.06176
CID 52942315	5.2518	4.23927	-2.30298
CID 52942554	4.1192	4.44438	0.73962
CID 52943304	4.3468	4.40011	0.12126
CID 52943627	4.1487	4.41426	0.60401
CID 52949734	3.9208	4.39414	1.0766
CID 52949735	4.0757	4.32388	0.56447
CID 52949744	3.8861	4.08628	0.45531
CID 52953031	4.3835	4.30452	-0.17965
CID 5296633	3.4699	3.20186	-0.60966
CID 5315472	4.4393	4.54127	0.23194
CID 5315860	4.8539	4.56571	-0.65549
CID 5317750	3	4.39951	3.18314
CID 5318156	4.054	4.63355	1.31818
CID 5318457	4.751	4.39825	-0.80233
CID 5318606	4.5528	4.80032	0.56299
CID 5319258	4.4557	4.09459	-0.82133
CID 5319895	4.2076	4.31094	0.23504
CID 5320237	4.4202	3.8875	-1.21162
CID 5320623	4.5967	4.25655	-0.77366
CID 5324427	3	3.55976	1.27315
CID 5324476	4.6704	4.73829	0.15442
CID 53245951	4.8125	4.61211	-0.45579
CID 53248678	4	4.01953	0.04443
CID 53323306	3.3315	4.18826	1.94869
CID 53323677	4.7852	4.46517	-0.72791
CID 53343162	3.699	4.32517	1.4242
CID 53359041	3.8539	4.04069	0.42486
CID 53359042	4.1146	4.0077	-0.24314
CID 5352090	4.5088	4.16917	-0.77249
CID 5353737	4.8125	4.59316	-0.49889
CID 5355326	3	3.60983	1.38704
CID 5355459	3.3994	4.02309	1.41857
CID 53600	3.382	3.43375	0.11771
CID 5375995	3	3.69637	1.58388
CID 5379302	4	3.94096	-0.13427
CID 5382849	4.9281	4.97216	0.10021
CID 5385357	4.5952	3.85386	-1.68615
CID 5387718	4.2218	4.50361	0.64097
CID 5398322	4.585	3.8165	-1.74794
CID 5405609	3.9508	3.75753	-0.43959
CID 5406133	3	3.72369	1.64602
CID 5411012	4.7258	4.868	0.32342
CID 5424	5.0283	5.03988	0.02634
CID 545076	5.6144	5.54811	-0.15077
CID 54578042	5.1062	4.54142	-1.28458
CID 54578254	5.2007	4.45422	-1.69786
CID 54578255	5.2366	4.69183	-1.23906
CID 54578256	5.2366	4.72542	-1.16266
CID 54580412	4.1175	4.16979	0.11893
CID 54581338	4.7328	4.21698	-1.17322
CID 54581732	4	4.58561	1.33196
CID 54581933	4.3933	4.4736	0.18264
CID 54582362	5.1249	3.96852	-2.63015
CID 54582857	4.313	4.32355	0.02399
CID 54582882	4.4351	4.336	-0.2254
CID 54582883	4.3502	4.40368	0.12165
CID 54583887	4	4.17624	0.40085
CID 54583888	4	3.90487	-0.21638
CID 54585255	4.7305	4.25307	-1.0859
CID 54585769	4.3422	4.47958	0.31247
CID 54586595	4	3.69846	-0.68585
CID 5466139	4.6676	4.50694	-0.36542
CID 54670067	4.3584	4.30765	-0.11543
CID 5467476	4.8771	4.68888	-0.42811
CID 5467589	4.2218	4.47142	0.56775
CID 54680783	3.7959	4.51376	1.63275
CID 5468263	4.8294	4.67154	-0.35906
CID 54683773	3.699	4.41249	1.62282
CID 5468519	4.8794	4.54072	-0.77032
CID 54685921	4.2306	4.4396	0.47537
CID 54707106	5.6216	4.46141	-2.63882
CID 5470829	4.1252	4.70278	1.3137
CID 54715402	5.6383	4.91925	-1.63547
CID 54718836	4.9547	5.29862	0.78224
CID 5472392	4.7696	4.70956	-0.13655
CID 54726150	5.6676	4.73013	-2.13226
CID 54726789	4.8508	4.43554	-0.9445
CID 54726790	4.9547	4.5049	-1.02306
CID 54728156	5.5513	4.24781	-2.96476
CID 5472867	3.301	3.98922	1.56534
CID 54729517	4.2798	4.5823	0.68803
CID 54737530	5.1249	4.71333	-0.93611
CID 54738771	5.684	4.87935	-1.83015
CID 54738873	3.7404	3.89954	0.36195
CID 54738874	3.6968	4.03901	0.77835
CID 54738875	3.6944	3.90109	0.47011
CID 54738876	3.8864	3.86059	-0.05871
CID 54738878	3.7921	4.19764	0.9224
CID 54738879	3.8022	4.1149	0.71122
CID 54738880	3.7802	4.81733	2.35893
CID 5486199	4.0757	4.426	0.79676
CID 5491408	5.4559	4.77992	-1.53751
CID 54921573	3.699	3.69358	-0.01233
CID 5492482	4.5214	4.47351	-0.10892
CID 5496206	4.2218	4.37326	0.34449
CID 5556829	5.6021	5.36762	-0.53331
CID 5568494	6.0315	5.3036	-1.6556
CID 56643424	4.9352	4.61369	-0.73126
CID 56835118	4.3413	4.11554	-0.51348
CID 56835120	4.7307	4.49309	-0.54044
CID 56835121	4.8841	4.88552	0.00324
CID 56925680	3.7825	4.23965	1.03977
CID 56925681	2.6778	3.80952	2.57408
CID 56925974	4.1899	4.00111	-0.42941
CID 56928518	3.0669	3.8825	1.85507
CID 56928519	4.4777	4.23378	-0.5548
CID 56928520	4.7902	3.88829	-2.05136
CID 56950653	4.1759	3.98461	-0.43508
CID 56950654	4.0501	3.95695	-0.21187
CID 5706863	3.9293	3.96227	0.07498
CID 57333567	4.4547	4.41374	-0.09315
CID 57381535	3.301	3.51315	0.48252
CID 57381978	3.301	3.25221	-0.11097
CID 57384054	4.6576	3.96831	-1.56778
CID 57384062	4.5346	4.65324	0.26985
CID 57391016	4.1171	3.94319	-0.39556
CID 57391061	3.8447	3.78674	-0.13182
CID 57391062	4.0862	3.71136	-0.85257
CID 57392855	4.585	5.03181	1.01625
CID 57392856	4.699	4.99661	0.6769
CID 57394535	3.5023	3.71659	0.48739
CID 57394578	3.8297	3.61911	-0.47898
CID 57394580	4.3565	4.635	0.63344
CID 57394581	4.4949	4.59796	0.2344
CID 57396328	4.6021	4.43359	-0.38327
CID 57396329	4.3188	4.48915	0.38746
CID 57396330	4.6383	4.82685	0.42885
CID 57399736	2.8707	3.63225	1.73214
CID 57399779	4.6576	4.07064	-1.33502
CID 57400005	4.4962	4.33094	-0.37588
CID 57401501	2.8901	3.96227	2.43863
CID 57401502	4.4362	4.23184	-0.46481
CID 57401553	4.5376	4.39981	-0.31339
CID 57401809	4.7033	4.34838	-0.80725
CID 57402423	4.7038	4.43123	-0.61995
CID 57403253	4.9784	3.76785	-2.75336
CID 57403301	3.7328	3.63713	-0.2176
CID 57403883	4.1675	4.84799	1.54776
CID 5742590	4.5229	4.09036	-0.98381
CID 5750975	5.6038	5.29905	-0.69315
CID 5829201	4.4225	3.98514	-0.99477
CID 5852	4.7721	4.02721	-1.69424
CID 58652864	4.9469	4.6261	-0.72966
CID 5919576	4.8153	4.50766	-0.69972
CID 5922182	4.9245	4.53393	-0.88834
CID 60148498	4.8386	4.23484	-1.37324
CID 60150388	4.0013	3.82393	-0.40343
CID 60201983	4.3655	3.81925	-1.24244
CID 60201984	3.6682	3.88349	0.48967
CID 608903	3.1139	3.28105	0.38017
CID 6175	4.5229	3.81835	-1.60248
CID 623407	3.8877	4.22201	0.76038
CID 6246186	3.8437	3.97263	0.29326
CID 6251	4.5229	4.65138	0.29222
CID 6287824	3.3594	3.80606	1.01591
CID 6325664	4.5229	4.86351	0.77472
CID 636721	4.9834	4.66526	-0.7236
CID 637542	3.699	4.41973	1.63929
CID 639465	4.8539	4.90092	0.10695
CID 639665	5.7033	4.82258	-2.00319
CID 640096	4.5986	4.37115	-0.51734
CID 6437306	3.301	4.37173	2.43535
CID 6438495	3.699	4.05984	0.82071
CID 6441059	4.6383	4.97233	0.75974
CID 6449880	4.6778	4.64309	-0.07896
CID 6454254	5.0555	3.88066	-2.67214
CID 6474310	4.4895	4.53219	0.0971
CID 6474788	4.3585	4.60814	0.56779
CID 6474893	3.5895	4.72738	2.58807
CID 6488369	3.4096	3.71452	0.69353
CID 65017687	3.699	3.6583	-0.09256
CID 65017744	3.699	3.65726	-0.09494
CID 65017829	3.699	3.59493	-0.2367
CID 65018060	3.699	3.70556	0.01491
CID 65064	3.7496	4.85635	2.51729
CID 6507117	4	3.80927	-0.43381
CID 6508134	3.1	3.79434	1.57927
CID 65090	4.1574	4.15344	-0.00902
CID 65126	4.2733	4.27705	0.00853
CID 66491	3.8256	3.72349	-0.23225
CID 667490	4.1871	4.10918	-0.17722
CID 667639	4.5452	4.98866	1.00863
CID 674723	4.2608	4.34578	0.19328
CID 676166	3.7447	3.61506	-0.29487
CID 676946	3.699	3.87562	0.40171
CID 677307	4.3575	4.01773	-0.77281
CID 677493	3.301	3.79979	1.13449
CID 68051	4.6021	4.40185	-0.45547
CID 68213	5.2757	4.72489	-1.25281
CID 689038	4.4547	4.68294	0.51912
CID 689075	4.6716	4.30586	-0.83187
CID 689111	4.9119	4.44125	-1.07049
CID 6932	4.7447	3.9223	-1.87052
CID 69495826	3.699	3.54908	-0.34098
CID 696323	3.0942	3.98134	2.01778
CID 697993	4.0362	3.82353	-0.48372
CID 6997502	4.6291	4.48026	-0.33853
CID 702382	3.9431	3.84173	-0.23055
CID 70681231	3.0805	3.62685	1.24266
CID 70681748	4.2048	4.65437	1.02254
CID 70682461	4.1549	4.07467	-0.18248
CID 70682701	3.3359	3.67994	0.78251
CID 70682702	5.0506	3.76621	-2.92131
CID 70684459	4.6038	4.05807	-1.24125
CID 70684548	4.1549	3.78189	-0.8484
CID 70684787	3.6482	3.74805	0.22712
CID 70686688	4.3645	4.35991	-0.01044
CID 70686689	4.2197	4.04202	-0.40414
CID 70686691	4.1549	4.01362	-0.32133
CID 70686692	4.1549	4.07336	-0.18546
CID 70688789	4.1549	4.34843	0.44018
CID 70689075	4.4627	4.52802	0.14857
CID 70690869	4.1549	3.91101	-0.55471
CID 70691116	3.9179	3.75636	-0.36741
CID 70692466	3.301	3.57463	0.62236
CID 70692919	3.3836	4.48513	2.5054
CID 70695319	3.2765	3.69542	0.95283
CID 70695320	3.8554	3.68825	-0.38017
CID 70697009	4.8827	4.20142	-1.54955
CID 70697096	4.1549	4.3997	0.55678
CID 709477	3.8324	3.76335	-0.15704
CID 71450402	4.5102	4.73146	0.50324
CID 71450618	3.8416	4.42999	1.33829
CID 71450619	4.8477	4.55962	-0.65523
CID 71451207	5.3279	4.37886	-2.15857
CID 71452228	4.4855	4.73196	0.56056
CID 71452459	3.9872	4.53655	1.24948
CID 71452460	3.9586	4.46409	1.14973
CID 71452462	4.4949	4.63056	0.30854
CID 71454039	4.4885	4.64057	0.34589
CID 71454766	4.983	4.36947	-1.39547
CID 71455973	4.1192	4.31297	0.44072
CID 71456537	5.3188	4.43767	-2.00412
CID 71457557	4.5217	4.5764	0.12441
CID 71458388	4.9547	4.418	-1.2207
CID 71459447	4.4889	4.68995	0.45728
CID 71459693	3.8761	4.37653	1.13823
CID 71461188	4.6028	4.7291	0.28726
CID 71461407	5	4.98165	-0.04174
CID 71461504	4.0458	4.04275	-0.00693
CID 71461505	4.7986	4.8175	0.04298
CID 71461949	5.0132	4.42944	-1.32775
CID 71462931	4.5774	4.85485	0.63106
CID 71463139	3.8508	4.30577	1.03483
CID 71463140	4.5528	4.50763	-0.10273
CID 71508437	4.3487	4.43315	0.19208
CID 71508486	4.3665	4.19013	-0.40116
CID 71508487	4.301	4.37038	0.15781
CID 71508488	4.301	4.36143	0.13745
CID 71508529	4.6759	4.64125	-0.0788
CID 71508530	4.8069	4.72638	-0.18315
CID 71508531	4.7144	4.59429	-0.27319
CID 71517036	3.9627	3.98812	0.05782
CID 71517041	3.1371	3.06319	-0.16811
CID 71517042	3.1931	3.2832	0.20492
CID 71517043	2.7792	3.7932	2.30632
CID 71517188	3.7692	3.83293	0.14495
CID 71519486	3.3031	3.77656	1.07686
CID 71519487	4.6428	4.0158	-1.4261
CID 71519488	4.5824	4.24878	-0.75881
CID 71519489	4.0357	4.0932	0.13079
CID 71519492	4.2047	3.99667	-0.47317
CID 71521887	4.3358	4.68736	0.79961
CID 71523994	3.0449	3.96852	2.10074
CID 71523998	4.219	4.09191	-0.28906
CID 71523999	4.0092	3.98286	-0.0599
CID 71524305	4.2581	4.00559	-0.57432
CID 71524306	4.2668	4.07985	-0.42521
CID 71524308	4.1891	4.58038	0.88996
CID 71524309	4.1858	4.46051	0.62483
CID 71524310	4.1739	4.39393	0.50044
CID 71560190	4.7305	4.80961	0.17993
CID 71560297	5.7696	5.15017	-1.40887
CID 71560299	5.7447	5.52951	-0.48944
CID 71560301	5.699	5.65113	-0.10888
CID 71575068	3.5591	3.62035	0.1393
CID 71575069	3.5229	3.44831	-0.16966
CID 71575158	3.6861	3.47002	-0.49147
CID 71575160	3.5686	3.56139	-0.01639
CID 71575161	3.7055	3.55653	-0.33883
CID 71575162	3.5482	3.50381	-0.10097
CID 71584322	4.6895	4.64424	-0.10295
CID 71607792	4.2518	4.07166	-0.40973
CID 71678227	5.0429	4.4769	-1.28735
CID 71681084	3.699	3.64761	-0.11688
CID 71681085	3.699	3.72738	0.06456
CID 71681086	3.699	3.81501	0.26387
CID 71681236	3.699	3.62665	-0.16456
CID 71681237	3.699	3.77789	0.17944
CID 71681388	3.699	3.72012	0.04804
CID 71681703	4.9547	4.33478	-1.40999
CID 71681704	4.8794	4.57734	-0.68703
CID 71681705	4.8539	4.53311	-0.72962
CID 71699120	4.5884	4.43756	-0.34307
CID 71699190	4.7852	4.476	-0.70328
CID 71699191	4.4461	4.21153	-0.53351
CID 71699192	4.1772	4.56142	0.87389
CID 71699278	4.5817	4.49677	-0.19317
CID 71699279	4.3872	4.46181	0.1697
CID 71716107	4.4577	4.29012	-0.38115
CID 71717069	4.0586	4.15608	0.22172
CID 71717382	4.4324	4.22042	-0.48214
CID 71717679	4.2411	4.63826	0.90334
CID 71718538	3.7963	3.94642	0.34144
CID 71719135	2.8909	3.38061	1.11384
CID 71719148	4.5464	4.22309	-0.73535
CID 71719321	4.1249	4.24339	0.2695
CID 71769550	4.9957	5.03097	0.08023
CID 71769551	5.041	5.10848	0.15347
CID 71769552	5.1549	5.11764	-0.08474
CID 71769554	5.1079	4.94332	-0.37433
CID 71769683	5.1427	5.14068	-0.0046
CID 71769684	5.0809	4.76536	-0.71769
CID 71769686	4.9508	4.8847	-0.15035
CID 71769687	5.0809	5.01016	-0.16089
CID 71769688	5.1675	5.1249	-0.09689
CID 719344	4.3372	4.04065	-0.6745
CID 72185	4.7447	4.15188	-1.34836
CID 72186	4.4935	4.32311	-0.38754
CID 72192259	3.699	4.07847	0.8631
CID 72192260	4.0182	4.16469	0.33318
CID 72192263	3.699	4.15615	1.03978
CID 72204382	4.4864	4.38076	-0.24027
CID 72204383	4.4284	4.36931	-0.13441
CID 72204385	4.5336	4.66707	0.30357
CID 72204386	4.6615	4.697	0.08075
CID 72204387	4.7073	4.35359	-0.80451
CID 72204576	4.4495	4.5369	0.1988
CID 72204577	4.0491	4.26733	0.49637
CID 72204578	4.5157	4.41263	-0.23444
CID 72204581	4.5045	3.99349	-1.16227
CID 72204684	4.0915	4.31546	0.50939
CID 72204771	4.4552	4.4747	0.04434
CID 72204772	4.4412	4.06655	-0.85213
CID 72204773	4.443	4.31029	-0.30184
CID 72204775	4.147	4.06022	-0.19738
CID 72204776	4.4447	4.43205	-0.02877
CID 72204777	4.3204	3.86105	-1.04478
CID 72204868	3.8729	3.84738	-0.05804
CID 72204870	3.9914	4.3588	0.83564
CID 72204950	4.4167	4.26551	-0.34387
CID 72204952	5.0625	4.47858	-1.32812
CID 72204953	4.0791	4.46444	0.87645
CID 72204954	4.5991	4.74756	0.33767
CID 72204956	4.4983	4.28002	-0.49647
CID 72205134	4.6498	4.28529	-0.82908
CID 72205135	4.025	4.76555	1.68436
CID 72205136	3.9683	4.1768	0.47422
CID 72206548	3.9586	4.7619	1.8271
CID 72276	4.3979	4.86667	1.0662
CID 72545288	4.1035	3.87846	-0.51186
CID 72545290	4.1238	3.96611	-0.35867
CID 72545531	4.0074	3.82787	-0.40835
CID 72545532	4.0205	3.8413	-0.40758
CID 72545533	4.1062	4.26735	0.36653
CID 72545535	4.3507	4.03107	-0.727
CID 72545537	4.1904	4.24707	0.12889
CID 72545538	4.2815	4.15238	-0.29368
CID 72545788	4.3468	3.93253	-0.94224
CID 72545789	4.2495	4.55972	0.70559
CID 72696877	4.8928	4.75826	-0.30601
CID 72697012	4.7595	4.58595	-0.39473
CID 72707526	3.7959	4.30006	1.14671
CID 72707527	3.7447	4.12014	0.85394
CID 72707589	3.3188	4.19733	1.99821
CID 72707592	3.7212	4.08173	0.82002
CID 72707593	3.2676	3.66412	0.90188
CID 72707595	2.8962	3.68704	1.79874
CID 72707658	2.9393	3.49771	1.27009
CID 72707659	3.2441	3.71747	1.07667
CID 72707662	3.3188	3.79651	1.08654
CID 72707663	3.0269	3.55038	1.19064
CID 72707737	3.1427	3.66055	1.17784
CID 72707738	3.1249	3.43594	0.70745
CID 72947661	4.821	5.07029	0.567
CID 72947662	4.5243	4.37427	-0.34124
CID 72947663	4.618	4.83631	0.49654
CID 72947665	4.7282	4.67173	-0.12843
CID 72947666	4.9547	5.30005	0.78549
CID 72947870	5.7959	4.8905	-2.05931
CID 73345791	4.5011	4.30187	-0.45316
CID 73346285	4.0088	3.94267	-0.15041
CID 73347787	4.7212	4.16038	-1.27557
CID 73348975	3.699	3.61633	-0.18802
CID 73349329	4.2518	4.03799	-0.4863
CID 73349330	4.0362	3.97878	-0.13061
CID 73350896	4.0655	3.89369	-0.39079
CID 73350897	4.6778	4.17229	-1.14977
CID 73352383	4.9586	4.79174	-0.37952
CID 73352385	4.9208	4.49814	-0.96134
CID 73353516	4.6882	4.34403	-0.78282
CID 73355382	4.1487	4.18127	0.07408
CID 73355383	3.8447	3.90423	0.1354
CID 73356935	3.8182	3.79889	-0.04391
CID 73356936	3.9031	3.9025	-0.00136
CID 73426406	4.762	4.28051	-1.09513
CID 736681	3.8239	3.81844	-0.01242
CID 7428	5.1079	4.98641	-0.27632
CID 745079	3.699	3.92648	0.51739
CID 76307996	4.2811	3.9041	-0.85748
CID 76308451	3.4949	3.52112	0.05963
CID 76309032	3.2468	3.21394	-0.07474
CID 76310270	4.7258	4.78992	0.14584
CID 76311591	3.699	4.15609	1.03965
CID 76311603	4	3.5966	-0.91753
CID 76315102	5.6216	4.81759	-1.82871
CID 76315134	3.678	3.74402	0.15015
CID 76316151	4.1754	3.95877	-0.49273
CID 76316152	4	3.9599	-0.0912
CID 76317396	4.8268	4.25467	-1.3013
CID 76317397	4.4597	3.78036	-1.54514
CID 76317497	3.5258	4.09422	1.29286
CID 76318807	4.0593	3.68546	-0.85029
CID 763204	3.699	3.82707	0.29129
CID 76320422	3.5074	3.98773	1.0925
CID 76322444	3.655	3.83095	0.40018
CID 76322445	3.6817	3.78226	0.22873
CID 76322482	4.6838	4.60041	-0.18967
CID 76323583	3.3563	3.17803	-0.40547
CID 76324847	4.4609	4.19191	-0.61182
CID 76326917	4.5143	4.03684	-1.08598
CID 76327084	4.4196	4.45155	0.07267
CID 76327085	4	4.00879	0.01999
CID 76328405	3.2449	3.87843	1.44095
CID 76329384	3.5229	3.97883	1.03701
CID 76330748	4	3.9635	-0.08301
CID 76330749	4	4.00859	0.01953
CID 76333822	3.7878	3.94279	0.35251
CID 76334179	4.2741	4.08841	-0.42235
CID 76334342	4.058	3.95467	-0.23501
CID 76334343	4.4455	4.44029	-0.01186
CID 76334871	3.2071	3.78105	1.30542
CID 76956	2.8928	3.68602	1.80416
CID 802112	3.699	3.66844	-0.06951
CID 804849	5.8697	4.93278	-2.13099
CID 84298	4.5229	3.55992	-2.19026
CID 8456	4.3665	3.91121	-1.03554
CID 8768	4.5317	4.89545	0.82735
CID 87935	3.4947	3.90731	0.93846
CID 8833050	4	4.26775	0.60899
CID 8858391	4.3372	4.18423	-0.34794
CID 9064	4.3098	4.7814	1.07265
CID 92097	3.301	4.06955	1.74804
CID 923087	3.6198	4.05375	0.98702
CID 932036	4.384	4.02098	-0.82568
CID 932147	3	3.74352	1.69112
CID 961456	3	4.07262	2.43965
CID 9813852	4.6426	4.39832	-0.55561
CID 9826353	4.4949	4.51438	0.0443
CID 9878547	3.699	4.26541	1.28828
CID 9880352	3.699	4.00507	0.69615
CID 9881652	4.2441	3.87003	-0.85082
CID 9938674	4.2757	4.24654	-0.06632
CID 99622	3.9337	4.44957	1.17334
CID 9972469	4.2907	4.71141	0.95689
CID 9973595	4.4647	4.57429	0.24925
CID 9976853	5.1249	4.82463	-0.68296
CID 9991705	4.8996	4.17153	-1.65597
CID 9994897	4.3224	4.57616	0.57717
CID 9996305	3.9872	3.70516	-0.6415

## Sheet: Table S2
CID	Reported pIC50	Predicted pIC50	Serie
CID 10029906	4.2757	4.55546	Train
CID 10030540	4.1694	3.85352	Train
CID 10072723	4.1612	4.38749	Train
CID 10082261	4.8477	4.06286	Train
CID 10150350	4.0501	4.19317	Train
CID 10178463	3.8477	4.21818	Train
CID 10193699	4.5229	4.54954	Train
CID 10215268	4.0788	4.03705	Train
CID 10215621	4.1805	4.09983	Train
CID 10221179	4.2487	4.75434	Train
CID 10264116	4.6234	4.17285	Train
CID 10328286	5.0969	4.71595	Train
CID 10339712	4	4.76635	Train
CID 10346004	4.6968	4.29127	Train
CID 10348496	4.1215	3.97008	Train
CID 10350153	4.6234	4.59735	Train
CID 10365840	3.301	4.0296	Train
CID 10370732	4.0701	3.89223	Train
CID 10377204	3.7825	3.49564	Train
CID 10385745	3.9578	3.92621	Train
CID 10387631	4.8861	4.65943	Train
CID 10402927	4.4449	4.5526	Train
CID 10414856	3.3979	4.23043	Train
CID 10423558	5.1079	4.62232	Train
CID 10425731	4.5086	4.44076	Train
CID 10433425	4.0953	4.39617	Train
CID 10435297	4.3565	4.48626	Train
CID 10436	6.0969	4.93112	Train
CID 10450920	4.8871	4.63747	Train
CID 10456516	5.0269	4.71221	Train
CID 10458989	4.1096	3.94711	Train
CID 10480940	4.7296	5.05153	Train
CID 1057	4.4225	4.62114	Train
CID 10810596	3.04	3.97256	Train
CID 10810597	3.0462	3.92809	Train
CID 10819104	3.4089	3.87923	Train
CID 10858	3	4.03323	Train
CID 10873461	4.5229	3.9016	Train
CID 10906376	3.8013	4.12102	Train
CID 10907594	3.9031	4.22817	Train
CID 10929258	4.6289	4.57536	Train
CID 10947808	4.4685	4.49643	Train
CID 10951440	4.8894	4.59349	Train
CID 11005695	4.301	4.34813	Train
CID 11005957	4.1805	4.4625	Train
CID 1101245	5.1385	4.96383	Train
CID 11015261	4.5229	3.90269	Train
CID 11035383	5.2924	4.97295	Train
CID 11039407	4.2596	4.13019	Train
CID 11042199	4.2034	3.84194	Train
CID 11077195	4.2441	4.3014	Train
CID 11103410	4.4815	4.52336	Train
CID 11114773	4	4.24618	Train
CID 11116966	4.6478	4.60861	Train
CID 11134199	3.699	3.88127	Train
CID 11135781	4.8761	4.27731	Train
CID 11153672	4.6716	4.4495	Train
CID 11181364	4.8182	4.19114	Train
CID 11188197	3.4413	3.66051	Train
CID 11203960	4.5229	3.98628	Train
CID 11224109	3.2041	3.17823	Train
CID 11236329	4.4123	4.29506	Train
CID 11247668	4.699	4.6085	Train
CID 11284880	4.1938	4.15493	Train
CID 11330069	3.301	3.39833	Train
CID 11365276	4.7493	4.48341	Train
CID 11365823	4.9431	4.17706	Train
CID 11381926	4.223	4.07516	Train
CID 11383736	4.8097	5.04914	Train
CID 11391937	4.8601	4.52111	Train
CID 11398079	4.4815	4.29309	Train
CID 11398272	3.4202	3.64188	Train
CID 11426529	4.6038	4.2451	Train
CID 11432381	3.7122	3.68512	Train
CID 11433035	4.5943	4.52393	Train
CID 11435579	2.9031	3.66476	Train
CID 11442705	4.4685	4.30652	Train
CID 11443924	4.2588	4.03394	Train
CID 11466771	3.2226	3.96052	Train
CID 11476782	4.0223	4.30136	Train
CID 11501	4.1321	4.03942	Train
CID 115252	3.2449	3.96758	Train
CID 11564573	4.9281	4.79736	Train
CID 11588549	4	3.83334	Train
CID 11611248	4.7595	4.28844	Train
CID 11654279	4.8861	4.40725	Train
CID 11655574	4.4318	4.40644	Train
CID 11673743	3.5376	4.12442	Train
CID 11682371	4.9747	4.14121	Train
CID 11704704	4.9208	4.86807	Train
CID 11719580	4.7447	4.46988	Train
CID 11724114	4.6716	4.5696	Train
CID 11752938	3.301	3.14772	Train
CID 11758702	3.4921	3.97953	Train
CID 11771413	5.5086	4.43837	Train
CID 11775863	4.2218	4.36557	Train
CID 11780726	4.6647	4.68758	Train
CID 11808877	4.3372	4.69474	Train
CID 11968471	3.9355	3.98631	Train
CID 1203	5	4.73485	Train
CID 1205040	5.5452	5.57237	Train
CID 12239518	3.3312	4.06751	Train
CID 12315415	3	4.22642	Train
CID 12329610	3.699	3.56089	Train
CID 12396823	5.3979	4.59297	Train
CID 12396824	4	4.58086	Train
CID 124886	4.0177	4.32781	Train
CID 12662957	3.4546	3.83185	Train
CID 126887	4.7852	4.39319	Train
CID 12693700	4.6684	4.70623	Train
CID 1276528	4.9219	4.87503	Train
CID 1281690	4.8377	4.90185	Train
CID 12855	3.699	3.45294	Train
CID 128889	4.5229	4.20033	Train
CID 12986066	5.6498	4.61315	Train
CID 130976	4.753	4.82096	Train
CID 13250466	4.2218	4.40878	Train
CID 13254473	4.1986	4.35258	Train
CID 13508053	3.8444	3.92882	Train
CID 13508055	4.5186	3.86277	Train
CID 13508060	4.2426	4.01948	Train
CID 13508061	4.3098	4.19075	Train
CID 13567735	3.637	3.77852	Train
CID 13760716	4.4342	4.10685	Train
CID 13857929	4.2218	4.12243	Train
CID 13857937	4.8239	4.54283	Train
CID 13888133	4.6861	4.78164	Train
CID 13919535	3.301	4.03779	Train
CID 13962928	4.3344	3.92003	Train
CID 13995449	4.6925	4.50159	Train
CID 14034194	4.7825	4.63795	Train
CID 14079440	4	4.09109	Train
CID 14237599	5.0223	4.18931	Train
CID 14332450	4.1669	4.48863	Train
CID 14353469	4.6615	4.41919	Train
CID 14407195	5.0362	4.70738	Train
CID 14454290	4.0757	3.82006	Train
CID 14467636	4.2007	4.25449	Train
CID 14467638	4.2596	4.21497	Train
CID 14467641	3.9547	3.97123	Train
CID 14578495	5.0132	5.39497	Train
CID 14840962	4.6596	4.05678	Train
CID 14887605	4.2351	4.64899	Train
CID 149806	4.5452	4.54471	Train
CID 14985	4.3615	4.1476	Train
CID 15126652	5.2449	4.48957	Train
CID 15307521	3.699	4.3241	Train
CID 1550234	3.4994	4.38276	Train
CID 1551384	4	3.92129	Train
CID 1551387	4	3.83497	Train
CID 15556234	5.4202	5.01925	Train
CID 15956	3.0041	3.75467	Train
CID 16040016	4.5376	4.38621	Train
CID 16079989	4.308	4.31903	Train
CID 16083179	4.289	4.61433	Train
CID 16091685	5.2125	3.79529	Train
CID 16104871	3.699	4.33056	Train
CID 16104872	4.6778	4.54713	Train
CID 16119668	4.2132	4.73825	Train
CID 161336	4.2518	4.07234	Train
CID 16216400	3.6968	3.54316	Train
CID 16216402	4.3468	3.69096	Train
CID 16216594	4.5719	4.38924	Train
CID 16655435	4.0726	3.86707	Train
CID 16757395	4.7328	4.44171	Train
CID 16757396	4.9788	4.80043	Train
CID 16757398	4.6198	4.5186	Train
CID 16896284	4	3.24927	Train
CID 1714173	4	3.86031	Train
CID 1716231	3.1701	3.71309	Train
CID 17391248	4	4.34443	Train
CID 17574027	3.3571	3.62818	Train
CID 17586047	3.2103	3.52201	Train
CID 17621068	4.1947	4.12381	Train
CID 1794427	4.342	4.45718	Train
CID 18100	4.4461	4.65227	Train
CID 185617	4.5722	4.58928	Train
CID 185766	4.9586	4.66814	Train
CID 188287	5.8539	4.65003	Train
CID 1909086	3.301	4.27718	Train
CID 1935	3	3.66073	Train
CID 19578261	4	3.50174	Train
CID 20055968	4	4.54166	Train
CID 20396990	4.0757	4.1709	Train
CID 21104932	4.8539	4.05875	Train
CID 2141	4	3.99194	Train
CID 21575482	4	4.2387	Train
CID 21577856	4.2154	4.2316	Train
CID 21586651	4.2924	3.94013	Train
CID 21589503	4.486	4.47293	Train
CID 21599888	4.0132	4.13775	Train
CID 21606617	4	4.29162	Train
CID 21676383	5.6021	4.54047	Train
CID 21722016	4.3809	4.71814	Train
CID 21778115	5.0915	4.64081	Train
CID 219800	4.5171	4.10259	Train
CID 219809	4.4962	4.08911	Train
CID 2202	4.2218	4.5754	Train
CID 22833196	4.821	4.24744	Train
CID 22909786	3.7481	4.26952	Train
CID 231320	3.7385	3.77869	Train
CID 23250007	5.4763	4.83554	Train
CID 23329295	3.4412	3.97707	Train
CID 23426771	5.0706	5.14839	Train
CID 23509264	3.9598	4.1276	Train
CID 23634522	4.1249	3.97873	Train
CID 23655345	4.1024	4.04487	Train
CID 23655528	4.0555	4.03272	Train
CID 23655530	4.0044	4.03887	Train
CID 23655531	3.9914	3.99051	Train
CID 23655532	3.2055	3.96221	Train
CID 23655737	4.1024	3.98934	Train
CID 23655738	4.0655	3.96286	Train
CID 23655739	4.1024	4.18318	Train
CID 23661682	3.699	4.36075	Train
CID 23797809	5.7799	5.71453	Train
CID 23798784	3.0255	3.42068	Train
CID 23844069	3.5258	4.03054	Train
CID 24148517	4.9355	4.71508	Train
CID 24180539	5.109	4.53955	Train
CID 246558	4.505	4.53053	Train
CID 24761035	5.3872	4.62303	Train
CID 24761045	5.0915	4.96373	Train
CID 24762916	5.1739	4.40169	Train
CID 24770033	5.1675	5.08125	Train
CID 24770502	5.3665	4.89541	Train
CID 24770504	5.3565	4.76458	Train
CID 24770505	5.2076	4.45033	Train
CID 24770506	5.3872	4.84296	Train
CID 24770577	5.585	4.78076	Train
CID 24770578	5.0706	4.83931	Train
CID 24816381	4.821	4.56239	Train
CID 24828114	4.8928	4.31334	Train
CID 24850196	4.2573	4.25573	Train
CID 24862577	3.5357	4.22273	Train
CID 24879405	4.8239	3.92403	Train
CID 24879406	4.9355	4.31299	Train
CID 24879475	4.9788	4.3103	Train
CID 24895134	4.2798	4.51058	Train
CID 24895199	4.2741	4.66902	Train
CID 24939263	3.3354	3.57237	Train
CID 24987042	4.5662	4.4624	Train
CID 25010554	3.9427	3.8579	Train
CID 25104522	4.9208	4.4071	Train
CID 25113729	4.3098	3.85557	Train
CID 25157858	4.4976	4.31497	Train
CID 25157861	4.4609	4.23851	Train
CID 25157862	4.4522	4.25777	Train
CID 25157863	4.5302	4.38192	Train
CID 2519	4	4.35089	Train
CID 25194979	3.7339	3.64371	Train
CID 25213354	4.3199	4.24774	Train
CID 25213355	3.893	4.23859	Train
CID 25213356	4.1612	4.36855	Train
CID 25213357	3.8975	4.24896	Train
CID 25213358	3.699	4.39313	Train
CID 25213588	4.3606	4.32601	Train
CID 25213589	3.699	4.20848	Train
CID 25266037	4.3585	4.04436	Train
CID 255057	3.7289	3.45131	Train
CID 259632	4.2411	4.34053	Train
CID 262164	3	4.10172	Train
CID 270039	4.6821	4.51721	Train
CID 2733208	3.9101	3.79872	Train
CID 2754024	3.0885	3.39866	Train
CID 2764	3.699	3.95926	Train
CID 2787704	4.6326	3.83726	Train
CID 2828680	3.3126	3.39942	Train
CID 2838890	3.2906	3.39018	Train
CID 2839009	3.1311	3.43351	Train
CID 2839135	3.6429	3.3839	Train
CID 289	4.4437	4.31212	Train
CID 3008868	5.082	5.05043	Train
CID 3084296	3.4841	3.73411	Train
CID 3086528	3.699	3.75337	Train
CID 31404	4.1818	4.05632	Train
CID 31553	3.5467	4.09555	Train
CID 3314	4.5607	4.1555	Train
CID 3355050	3.6153	3.94216	Train
CID 345686	3.699	3.46164	Train
CID 370	4.4957	5.03367	Train
CID 3802178	4.0584	3.8367	Train
CID 3831191	4.62	3.79076	Train
CID 3840	4.1586	4.41202	Train
CID 3928772	2.3979	3.49774	Train
CID 4004523	3.969	3.91528	Train
CID 4021	4.5505	3.91684	Train
CID 402956	4.4992	4.66666	Train
CID 407032	4.2218	3.94642	Train
CID 4161478	3	4.0054	Train
CID 4237287	4.0585	3.92792	Train
CID 42638803	3.1784	3.93528	Train
CID 42638804	3.313	4.18495	Train
CID 42638805	3.1361	3.96423	Train
CID 42638806	3.9876	4.08853	Train
CID 42639496	3.6256	4.17064	Train
CID 42639502	3.5511	4.79608	Train
CID 436659	4.2218	4.25931	Train
CID 43797805	3.6383	3.79049	Train
CID 44093	4.3665	3.5509	Train
CID 440991	4.1785	4.50877	Train
CID 44138908	3.699	4.18707	Train
CID 44138909	3.699	4.65072	Train
CID 44138910	3.8509	4.33875	Train
CID 44139044	3.699	4.54628	Train
CID 442009	3.9431	4.07836	Train
CID 44230016	4.821	4.10802	Train
CID 44241592	4.5907	4.75669	Train
CID 442510	3.2132	3.93917	Train
CID 442675	5.2924	4.48459	Train
CID 44321330	3.5229	4.14042	Train
CID 44321706	4.0851	4.18376	Train
CID 44321707	3.7913	4.17709	Train
CID 44321708	3.5229	4.06642	Train
CID 44361591	4.1512	4.68543	Train
CID 44390839	4.7222	4.61084	Train
CID 44390895	4.8111	4.86333	Train
CID 44399283	4.6635	4.26157	Train
CID 44399287	3.9263	4.18014	Train
CID 44399367	4.6055	4.12153	Train
CID 44399373	3.6698	3.94968	Train
CID 44399392	4.1778	4.08858	Train
CID 44399410	4.3675	4.16045	Train
CID 44399510	4.0926	4.1275	Train
CID 44399514	3.9809	4.10344	Train
CID 44399572	4.3969	4.17909	Train
CID 44405862	3.699	4.33238	Train
CID 44405880	3.699	4.24919	Train
CID 44410484	4	4.23327	Train
CID 44410486	4	4.11624	Train
CID 44418770	4.3947	4.5074	Train
CID 44419312	4	4.50903	Train
CID 44421292	3.8794	4.17033	Train
CID 44421293	4.2596	4.30588	Train
CID 44421295	3.8327	3.65806	Train
CID 44423083	4.5229	3.93275	Train
CID 44423248	5.0088	4.52451	Train
CID 44423249	4.8794	4.28462	Train
CID 44423250	4.6038	4.09523	Train
CID 44423602	3.8489	3.98846	Train
CID 44425453	4.7474	4.89017	Train
CID 44425454	5.3893	5.19003	Train
CID 44425455	5.0088	4.85267	Train
CID 44425458	4.7552	4.93172	Train
CID 44425459	4.4931	4.85767	Train
CID 44427222	3.699	3.91886	Train
CID 44429050	4.2774	4.52064	Train
CID 44429837	4.7533	4.39685	Train
CID 44432251	5.0809	4.39462	Train
CID 44437163	4.6596	4.56349	Train
CID 44437164	5.0146	4.95755	Train
CID 44437165	4.7929	4.10744	Train
CID 44437166	4.7069	4.77289	Train
CID 44443271	4.512	4.26476	Train
CID 44443273	4.6144	4.38387	Train
CID 44443275	4.5945	4.46624	Train
CID 44443280	4	4.16686	Train
CID 44445553	4.0088	3.9929	Train
CID 44445554	2.9987	3.77814	Train
CID 44445556	4.2218	3.99869	Train
CID 44445800	5.3665	4.69649	Train
CID 44447175	4.1367	3.84858	Train
CID 44447177	3.7525	3.8546	Train
CID 44452395	4.2596	4.59417	Train
CID 44452398	4.5229	4.57194	Train
CID 44452425	4.585	4.40489	Train
CID 44452645	3.2182	3.46837	Train
CID 44452647	3.567	3.51516	Train
CID 44452667	3	3.36034	Train
CID 44452668	3.567	3.61021	Train
CID 44452689	3	3.61268	Train
CID 44478418	3.301	4.33201	Train
CID 44478682	3.301	4.29695	Train
CID 44511362	3.3768	3.39011	Train
CID 44512371	4.5158	4.42075	Train
CID 44514059	5.0605	4.48235	Train
CID 445154	4.1403	4.51313	Train
CID 44558989	4.7033	4.37885	Train
CID 44559222	4.9208	4.38535	Train
CID 44559252	3.6308	4.01077	Train
CID 44559633	4.2933	4.23229	Train
CID 44560003	4.9788	4.40738	Train
CID 44566939	4.5126	4.56772	Train
CID 44567286	4.2612	4.06922	Train
CID 44567287	4.3497	4.05975	Train
CID 44567617	4.5719	3.97789	Train
CID 44567621	4.2314	3.82268	Train
CID 44567622	3.9097	4.67381	Train
CID 44575069	4.4449	4.3654	Train
CID 44575382	4.7721	4.68781	Train
CID 44575383	4.5229	3.88835	Train
CID 44575409	3.2857	3.25093	Train
CID 44575735	3.585	3.66112	Train
CID 44575749	4.7375	4.36165	Train
CID 44575752	4.327	4.21213	Train
CID 44577121	3.5467	4.00036	Train
CID 44583433	3.2757	3.41407	Train
CID 44583461	3.2924	3.80917	Train
CID 44583938	4.3399	4.41271	Train
CID 44583939	3.9037	4.45262	Train
CID 44583980	4.5229	3.7583	Train
CID 44583983	4.5229	3.88571	Train
CID 44585556	4.3019	4.20966	Train
CID 445858	4.2497	4.36275	Train
CID 44590821	4.8321	4.91277	Train
CID 44593352	4	4.18725	Train
CID 44594138	5.4685	4.77838	Train
CID 44632495	4.0747	4.87662	Train
CID 44634400	3.8831	4.15129	Train
CID 44715189	4.9431	4.40868	Train
CID 44715357	5.1024	4.49572	Train
CID 45101466	3.838	3.78338	Train
CID 45101503	3.5229	3.76413	Train
CID 45101504	4.9586	4.63389	Train
CID 45267451	3.301	3.81651	Train
CID 45267461	3.301	3.74926	Train
CID 45267464	3.301	3.86888	Train
CID 45268302	3.301	3.7311	Train
CID 45269176	3.301	3.75555	Train
CID 45269193	3.301	3.71539	Train
CID 45269663	3.699	3.85553	Train
CID 45269664	3.699	3.87463	Train
CID 45269748	3.5624	4.33614	Train
CID 45269965	4.1196	4.37977	Train
CID 45270503	3.699	3.52681	Train
CID 45271625	5.5969	4.62537	Train
CID 45271708	3.301	4.04768	Train
CID 45271723	3.301	3.21011	Train
CID 45272288	3.806	4.17884	Train
CID 45481544	4.5031	4.16395	Train
CID 45481546	4.382	4.29143	Train
CID 45484290	2.8539	3.83094	Train
CID 45484392	3.9586	3.82159	Train
CID 45486328	4.4015	4.10053	Train
CID 45486330	4.3404	4.07864	Train
CID 46182908	3	4.35824	Train
CID 46184559	4.4248	3.94735	Train
CID 46223916	5.0757	4.05079	Train
CID 46227124	3.5229	3.86303	Train
CID 46227125	3.5229	3.78972	Train
CID 46227137	3.5229	3.78962	Train
CID 46227138	3.5229	3.88982	Train
CID 46227139	4.4168	4.59547	Train
CID 46227181	3.5229	3.75998	Train
CID 46227186	3.5229	3.88699	Train
CID 46230189	3.699	3.88251	Train
CID 46704104	4.0888	4.09546	Train
CID 467296	4.9666	4.62066	Train
CID 46853900	4.2218	4.36329	Train
CID 46853901	4.2218	3.9924	Train
CID 46853902	5.1135	4.02912	Train
CID 46853904	4.2218	4.34955	Train
CID 46853907	4.2218	4.10983	Train
CID 46853908	4.2218	4.15909	Train
CID 46854056	4.2218	4.10892	Train
CID 46854057	4.2218	4.12781	Train
CID 46856146	5.4089	4.57947	Train
CID 46856147	4.2218	4.14008	Train
CID 46856148	4.2218	4.43923	Train
CID 46856154	4.2218	4.15357	Train
CID 46886871	4.4559	4.31384	Train
CID 46890011	3.7567	3.77386	Train
CID 46911009	4.0991	4.36993	Train
CID 46911010	4.057	4.22866	Train
CID 46918734	4.301	4.04953	Train
CID 46918735	4.301	4.19649	Train
CID 46919224	4.4078	4.02591	Train
CID 47576	3.4895	3.3672	Train
CID 484754	4.1314	3.83221	Train
CID 484757	3.7817	3.91803	Train
CID 4912	4.2785	4.12684	Train
CID 4947	4.4245	4.63131	Train
CID 49796926	4.9702	4.5583	Train
CID 49798007	4.0168	4.81728	Train
CID 49798009	4.0585	4.42513	Train
CID 49798010	4.0531	4.40921	Train
CID 49798011	3.7857	4.17215	Train
CID 49798034	3.9893	4.99433	Train
CID 49798035	3.9473	4.12294	Train
CID 49798037	3.6936	4.22499	Train
CID 49800189	4.1649	3.7606	Train
CID 49837277	4.3036	4.33392	Train
CID 49837278	4.2449	4.28719	Train
CID 49837279	4.2874	4.69228	Train
CID 49837381	4.2111	4.26503	Train
CID 49837382	4.1993	4.09995	Train
CID 49840039	5.3979	4.76326	Train
CID 49840041	4	4.76465	Train
CID 49840042	5.3468	4.76378	Train
CID 49840043	5.041	4.76235	Train
CID 49862872	4.2218	3.80312	Train
CID 49863288	5.1192	4.29208	Train
CID 49866356	4.2041	4.13226	Train
CID 49866357	4.0017	3.87138	Train
CID 49866360	4	3.96781	Train
CID 50899162	4.0655	4.18055	Train
CID 50899163	4.2596	4.24495	Train
CID 50899852	4.4166	4.27684	Train
CID 50899867	3.699	3.76727	Train
CID 50901250	3.699	3.87407	Train
CID 50901252	3.699	4.00444	Train
CID 50908786	3.699	3.65741	Train
CID 51040210	4.1124	3.8735	Train
CID 513197	4.4508	4.18735	Train
CID 51991	4.2218	3.9624	Train
CID 5213	2.6778	4.0168	Train
CID 5274585	4.3893	4.74843	Train
CID 5276405	5.1238	4.63691	Train
CID 5280343	4.4646	4.85402	Train
CID 5280445	4.983	4.82262	Train
CID 5280805	4.9087	4.64875	Train
CID 5280863	4.0472	4.65687	Train
CID 5281426	3.3979	4.53649	Train
CID 5281600	3.7352	4.30201	Train
CID 5281607	4	4.13221	Train
CID 5281703	4	4.4835	Train
CID 5281708	3	4.04711	Train
CID 5281712	4.5171	4.56412	Train
CID 5281718	3.7011	4.28487	Train
CID 5281773	4.6778	4.51298	Train
CID 5281787	4.9172	4.40832	Train
CID 5282102	4	4.53931	Train
CID 5282149	4	4.52769	Train
CID 5284649	4.4868	4.34653	Train
CID 52918154	5.0991	5.20086	Train
CID 52918156	4.8462	4.42693	Train
CID 52942315	5.2518	4.21442	Train
CID 52942554	4.1192	4.31953	Train
CID 52943304	4.3468	4.15916	Train
CID 52943627	4.1487	4.22559	Train
CID 52949734	3.9208	4.25705	Train
CID 52949735	4.0757	4.12052	Train
CID 52949744	3.8861	4.07354	Train
CID 52953031	4.3835	4.21407	Train
CID 5296633	3.4699	3.21828	Train
CID 5315472	4.4393	4.74845	Train
CID 5315860	4.8539	4.47255	Train
CID 5317750	3	4.36117	Train
CID 5318156	4.054	4.32054	Train
CID 5318457	4.751	4.64696	Train
CID 5318606	4.5528	4.88675	Train
CID 5319258	4.4557	4.50319	Train
CID 5319895	4.2076	4.16694	Train
CID 5320237	4.4202	3.97456	Train
CID 5320623	4.5967	4.42249	Train
CID 5324427	3	3.68048	Train
CID 5324476	4.6704	4.99715	Train
CID 53245951	4.8125	4.53305	Train
CID 53248678	4	4.17664	Train
CID 53323306	3.3315	4.14764	Train
CID 53323677	4.7852	4.29135	Train
CID 53343162	3.699	4.34206	Train
CID 53359041	3.8539	4.20458	Train
CID 53359042	4.1146	4.23944	Train
CID 5352090	4.5088	4.1586	Train
CID 5353737	4.8125	4.45015	Train
CID 5355326	3	3.71998	Train
CID 5355459	3.3994	4.11641	Train
CID 53600	3.382	3.48353	Train
CID 5375995	3	3.82193	Train
CID 5379302	4	3.83858	Train
CID 5382849	4.9281	4.92571	Train
CID 5385357	4.5952	3.94574	Train
CID 5387718	4.2218	4.60881	Train
CID 5398322	4.585	3.90188	Train
CID 5405609	3.9508	3.84901	Train
CID 5406133	3	3.84597	Train
CID 5411012	4.7258	4.67784	Train
CID 5424	5.0283	5.42336	Train
CID 545076	5.6144	5.24205	Train
CID 54578042	5.1062	4.45704	Train
CID 54578254	5.2007	4.30514	Train
CID 54578255	5.2366	4.62185	Train
CID 54578256	5.2366	4.65295	Train
CID 54580412	4.1175	4.25934	Train
CID 54581338	4.7328	4.11793	Train
CID 54581732	4	4.57141	Train
CID 54581933	4.3933	4.45291	Train
CID 54582362	5.1249	3.91801	Train
CID 54582857	4.313	4.39219	Train
CID 54582882	4.4351	4.41046	Train
CID 54582883	4.3502	4.56689	Train
CID 54583887	4	4.31082	Train
CID 54583888	4	4.07955	Train
CID 54585255	4.7305	4.14443	Train
CID 54585769	4.3422	4.59666	Train
CID 54586595	4	3.81466	Train
CID 5466139	4.6676	4.36028	Train
CID 54670067	4.3584	4.49393	Train
CID 5467476	4.8771	4.75194	Train
CID 5467589	4.2218	4.55403	Train
CID 54680783	3.7959	4.41755	Train
CID 5468263	4.8294	4.6092	Train
CID 54683773	3.699	4.33218	Train
CID 5468519	4.8794	4.29006	Train
CID 54685921	4.2306	4.43669	Train
CID 54707106	5.6216	4.46244	Train
CID 5470829	4.1252	4.57535	Train
CID 54715402	5.6383	4.62361	Train
CID 54718836	4.9547	5.15955	Train
CID 5472392	4.7696	4.50012	Train
CID 54726150	5.6676	4.5962	Train
CID 54726789	4.8508	4.32974	Train
CID 54726790	4.9547	4.39012	Train
CID 54728156	5.5513	4.32486	Train
CID 5472867	3.301	4.13244	Train
CID 54729517	4.2798	4.47759	Train
CID 54737530	5.1249	4.57023	Train
CID 54738771	5.684	4.62797	Train
CID 54738873	3.7404	3.80651	Train
CID 54738874	3.6968	4.12207	Train
CID 54738875	3.6944	3.54957	Train
CID 54738876	3.8864	4.12594	Train
CID 54738878	3.7921	4.16395	Train
CID 54738879	3.8022	3.66993	Train
CID 54738880	3.7802	4.55541	Train
CID 5486199	4.0757	4.07186	Train
CID 5491408	5.4559	4.87645	Train
CID 54921573	3.699	3.7447	Train
CID 5492482	4.5214	4.56885	Train
CID 5496206	4.2218	4.39847	Train
CID 5556829	5.6021	4.99592	Train
CID 5568494	6.0315	4.91866	Train
CID 56643424	4.9352	4.56144	Train
CID 56835118	4.3413	4.31841	Train
CID 56835120	4.7307	4.60499	Train
CID 56835121	4.8841	4.83947	Train
CID 56925680	3.7825	4.32157	Train
CID 56925681	2.6778	3.83263	Train
CID 56925974	4.1899	4.13028	Train
CID 56928518	3.0669	3.72667	Train
CID 56928519	4.4777	3.91524	Train
CID 56928520	4.7902	3.59179	Train
CID 56950653	4.1759	3.95409	Train
CID 56950654	4.0501	3.93167	Train
CID 5706863	3.9293	3.95279	Train
CID 57333567	4.4547	4.48234	Train
CID 57381535	3.301	3.51061	Train
CID 57381978	3.301	3.6804	Train
CID 57384054	4.6576	4.08084	Train
CID 57384062	4.5346	4.52898	Train
CID 57391016	4.1171	3.49584	Train
CID 57391061	3.8447	3.97045	Train
CID 57391062	4.0862	4.04195	Train
CID 57392855	4.585	4.9945	Train
CID 57392856	4.699	4.91426	Train
CID 57394535	3.5023	3.4569	Train
CID 57394578	3.8297	3.80324	Train
CID 57394580	4.3565	4.61686	Train
CID 57394581	4.4949	4.54303	Train
CID 57396328	4.6021	4.46073	Train
CID 57396329	4.3188	4.46019	Train
CID 57396330	4.6383	4.93476	Train
CID 57399736	2.8707	3.68302	Train
CID 57399779	4.6576	4.04687	Train
CID 57400005	4.4962	4.27818	Train
CID 57401501	2.8901	3.9418	Train
CID 57401502	4.4362	3.91296	Train
CID 57401553	4.5376	4.29148	Train
CID 57401809	4.7033	4.30022	Train
CID 57402423	4.7038	4.48841	Train
CID 57403253	4.9784	3.73768	Train
CID 57403301	3.7328	3.82596	Train
CID 57403883	4.1675	4.99498	Train
CID 5742590	4.5229	4.03804	Train
CID 5750975	5.6038	5.29456	Train
CID 5829201	4.4225	4.0917	Train
CID 5852	4.7721	3.97672	Train
CID 58652864	4.9469	4.56577	Train
CID 5919576	4.8153	4.41084	Train
CID 5922182	4.9245	4.43697	Train
CID 60148498	4.8386	4.16298	Train
CID 60150388	4.0013	3.86726	Train
CID 60201983	4.3655	3.88341	Train
CID 60201984	3.6682	3.8268	Train
CID 608903	3.1139	3.46466	Train
CID 6175	4.5229	3.81891	Train
CID 623407	3.8877	4.13766	Train
CID 6246186	3.8437	4.04045	Train
CID 6251	4.5229	4.1257	Train
CID 6287824	3.3594	3.89909	Train
CID 6325664	4.5229	4.31321	Train
CID 636721	4.9834	4.57499	Train
CID 637542	3.699	4.44869	Train
CID 639465	4.8539	4.74252	Train
CID 639665	5.7033	4.69892	Train
CID 640096	4.5986	4.26223	Train
CID 6437306	3.301	4.77789	Train
CID 6438495	3.699	4.10603	Train
CID 6441059	4.6383	4.7515	Train
CID 6449880	4.6778	4.47631	Train
CID 6454254	5.0555	3.94496	Train
CID 6474310	4.4895	4.48576	Train
CID 6474788	4.3585	4.7328	Train
CID 6474893	3.5895	4.92568	Train
CID 6488369	3.4096	4.08427	Train
CID 65017687	3.699	3.42586	Train
CID 65017744	3.699	3.28455	Train
CID 65017829	3.699	3.25664	Train
CID 65018060	3.699	3.29431	Train
CID 65064	3.7496	4.58344	Train
CID 6507117	4	3.9248	Train
CID 6508134	3.1	4.00987	Train
CID 65090	4.1574	4.3666	Train
CID 65126	4.2733	4.13113	Train
CID 66491	3.8256	3.67316	Train
CID 667490	4.1871	4.02841	Train
CID 667639	4.5452	4.68877	Train
CID 674723	4.2608	4.1865	Train
CID 676166	3.7447	3.92543	Train
CID 676946	3.699	3.99661	Train
CID 677307	4.3575	4.10275	Train
CID 677493	3.301	3.90583	Train
CID 68051	4.6021	4.34304	Train
CID 68213	5.2757	4.72418	Train
CID 689038	4.4547	4.57115	Train
CID 689075	4.6716	4.50162	Train
CID 689111	4.9119	4.325	Train
CID 6932	4.7447	3.99858	Train
CID 69495826	3.699	3.57139	Train
CID 696323	3.0942	3.91436	Train
CID 697993	4.0362	4.39902	Train
CID 6997502	4.6291	4.43311	Train
CID 702382	3.9431	3.61319	Train
CID 70681231	3.0805	3.9037	Train
CID 70681748	4.2048	4.73874	Train
CID 70682461	4.1549	3.93495	Train
CID 70682701	3.3359	3.83641	Train
CID 70682702	5.0506	3.85988	Train
CID 70684459	4.6038	4.11873	Train
CID 70684548	4.1549	3.8865	Train
CID 70684787	3.6482	3.81976	Train
CID 70686688	4.3645	4.35903	Train
CID 70686689	4.2197	3.88624	Train
CID 70686691	4.1549	3.79008	Train
CID 70686692	4.1549	3.90913	Train
CID 70688789	4.1549	4.36086	Train
CID 70689075	4.4627	4.61977	Train
CID 70690869	4.1549	3.93982	Train
CID 70691116	3.9179	3.81964	Train
CID 70692466	3.301	3.86375	Train
CID 70692919	3.3836	4.56466	Train
CID 70695319	3.2765	3.84885	Train
CID 70695320	3.8554	3.83389	Train
CID 70697009	4.8827	4.27074	Train
CID 70697096	4.1549	4.44333	Train
CID 709477	3.8324	4.06726	Train
CID 71450402	4.5102	4.49402	Train
CID 71450618	3.8416	4.47011	Train
CID 71450619	4.8477	4.66433	Train
CID 71451207	5.3279	4.47573	Train
CID 71452228	4.4855	4.70936	Train
CID 71452459	3.9872	4.57447	Train
CID 71452460	3.9586	4.53279	Train
CID 71452462	4.4949	4.54953	Train
CID 71454039	4.4885	4.73542	Train
CID 71454766	4.983	4.40951	Train
CID 71455973	4.1192	4.46074	Train
CID 71456537	5.3188	4.49005	Train
CID 71457557	4.5217	4.5356	Train
CID 71458388	4.9547	4.42311	Train
CID 71459447	4.4889	4.69726	Train
CID 71459693	3.8761	4.47846	Train
CID 71461188	4.6028	4.69097	Train
CID 71461407	5	4.72637	Train
CID 71461504	4.0458	3.86099	Train
CID 71461505	4.7986	4.36508	Train
CID 71461949	5.0132	4.43038	Train
CID 71462931	4.5774	4.8954	Train
CID 71463139	3.8508	4.43942	Train
CID 71463140	4.5528	4.48926	Train
CID 71508437	4.3487	4.34829	Train
CID 71508486	4.3665	4.24745	Train
CID 71508487	4.301	4.30237	Train
CID 71508488	4.301	4.31105	Train
CID 71508529	4.6759	4.96281	Train
CID 71508530	4.8069	4.96744	Train
CID 71508531	4.7144	4.79183	Train
CID 71517036	3.9627	4.0193	Train
CID 71517041	3.1371	3.13894	Train
CID 71517042	3.1931	3.50219	Train
CID 71517043	2.7792	4.01995	Train
CID 71517188	3.7692	3.91697	Train
CID 71519486	3.3031	3.78467	Train
CID 71519487	4.6428	4.1362	Train
CID 71519488	4.5824	4.31501	Train
CID 71519489	4.0357	4.19236	Train
CID 71519492	4.2047	3.96165	Train
CID 71521887	4.3358	4.45486	Train
CID 71523994	3.0449	3.97131	Train
CID 71523998	4.219	4.07791	Train
CID 71523999	4.0092	4.03174	Train
CID 71524305	4.2581	3.96782	Train
CID 71524306	4.2668	4.01036	Train
CID 71524308	4.1891	4.57038	Train
CID 71524309	4.1858	4.47536	Train
CID 71524310	4.1739	4.57301	Train
CID 71560190	4.7305	5.08256	Train
CID 71560297	5.7696	5.38969	Train
CID 71560299	5.7447	5.33307	Train
CID 71560301	5.699	5.64397	Train
CID 71575068	3.5591	3.60495	Train
CID 71575069	3.5229	3.64175	Train
CID 71575158	3.6861	3.63635	Train
CID 71575160	3.5686	3.68048	Train
CID 71575161	3.7055	3.64833	Train
CID 71575162	3.5482	3.64886	Train
CID 71584322	4.6895	4.66219	Train
CID 71607792	4.2518	3.96074	Train
CID 71678227	5.0429	4.50009	Train
CID 71681084	3.699	3.41555	Train
CID 71681085	3.699	3.53895	Train
CID 71681086	3.699	3.36668	Train
CID 71681236	3.699	3.71991	Train
CID 71681237	3.699	4.0468	Train
CID 71681388	3.699	3.55924	Train
CID 71681703	4.9547	4.42138	Train
CID 71681704	4.8794	4.60341	Train
CID 71681705	4.8539	4.45814	Train
CID 71699120	4.5884	4.16965	Train
CID 71699190	4.7852	4.23478	Train
CID 71699191	4.4461	4.12667	Train
CID 71699192	4.1772	4.33005	Train
CID 71699278	4.5817	4.23792	Train
CID 71699279	4.3872	4.17468	Train
CID 71716107	4.4577	4.43839	Train
CID 71717069	4.0586	4.16793	Train
CID 71717382	4.4324	4.35973	Train
CID 71717679	4.2411	4.42354	Train
CID 71718538	3.7963	3.97458	Train
CID 71719135	2.8909	3.39784	Train
CID 71719148	4.5464	4.40508	Train
CID 71719321	4.1249	4.48335	Train
CID 71769550	4.9957	4.97592	Train
CID 71769551	5.041	4.96489	Train
CID 71769552	5.1549	5.01712	Train
CID 71769554	5.1079	5.09401	Train
CID 71769683	5.1427	4.87681	Train
CID 71769684	5.0809	5.10515	Train
CID 71769686	4.9508	4.99364	Train
CID 71769687	5.0809	5.0951	Train
CID 71769688	5.1675	5.08053	Train
CID 719344	4.3372	4.05327	Train
CID 72185	4.7447	3.9205	Train
CID 72186	4.4935	4.23528	Train
CID 72192259	3.699	4.03305	Train
CID 72192260	4.0182	4.07067	Train
CID 72192263	3.699	4.26945	Train
CID 72204382	4.4864	4.37721	Train
CID 72204383	4.4284	4.38579	Train
CID 72204385	4.5336	4.52266	Train
CID 72204386	4.6615	4.53529	Train
CID 72204387	4.7073	4.36909	Train
CID 72204576	4.4495	4.50167	Train
CID 72204577	4.0491	4.48559	Train
CID 72204578	4.5157	4.50178	Train
CID 72204581	4.5045	3.95521	Train
CID 72204684	4.0915	4.56763	Train
CID 72204771	4.4552	4.57779	Train
CID 72204772	4.4412	4.47672	Train
CID 72204773	4.443	4.5377	Train
CID 72204775	4.147	4.57447	Train
CID 72204776	4.4447	4.32726	Train
CID 72204777	4.3204	3.94357	Train
CID 72204868	3.8729	3.92812	Train
CID 72204870	3.9914	4.32646	Train
CID 72204950	4.4167	4.19532	Train
CID 72204952	5.0625	4.50613	Train
CID 72204953	4.0791	4.39814	Train
CID 72204954	4.5991	4.70042	Train
CID 72204956	4.4983	4.56814	Train
CID 72205134	4.6498	4.06709	Train
CID 72205135	4.025	4.26283	Train
CID 72205136	3.9683	4.26694	Train
CID 72206548	3.9586	4.73485	Train
CID 72276	4.3979	4.78598	Train
CID 72545288	4.1035	3.90429	Train
CID 72545290	4.1238	3.8858	Train
CID 72545531	4.0074	3.85217	Train
CID 72545532	4.0205	3.91528	Train
CID 72545533	4.1062	4.07125	Train
CID 72545535	4.3507	3.98531	Train
CID 72545537	4.1904	4.19234	Train
CID 72545538	4.2815	4.17972	Train
CID 72545788	4.3468	4.14448	Train
CID 72545789	4.2495	4.53183	Train
CID 72696877	4.8928	4.68871	Train
CID 72697012	4.7595	4.36379	Train
CID 72707526	3.7959	4.43112	Train
CID 72707527	3.7447	4.39507	Train
CID 72707589	3.3188	4.27428	Train
CID 72707592	3.7212	4.38217	Train
CID 72707593	3.2676	3.62262	Train
CID 72707595	2.8962	3.52034	Train
CID 72707658	2.9393	3.42124	Train
CID 72707659	3.2441	3.67524	Train
CID 72707662	3.3188	3.69007	Train
CID 72707663	3.0269	3.58934	Train
CID 72707737	3.1427	3.45509	Train
CID 72707738	3.1249	3.27549	Train
CID 72947661	4.821	4.98711	Train
CID 72947662	4.5243	4.84093	Train
CID 72947663	4.618	4.94031	Train
CID 72947665	4.7282	4.93589	Train
CID 72947666	4.9547	5.32213	Train
CID 72947870	5.7959	4.60785	Train
CID 73345791	4.5011	4.14404	Train
CID 73346285	4.0088	4.09291	Train
CID 73347787	4.7212	4.3078	Train
CID 73348975	3.699	3.57322	Train
CID 73349329	4.2518	3.97469	Train
CID 73349330	4.0362	4.11203	Train
CID 73350896	4.0655	4.06642	Train
CID 73350897	4.6778	4.31531	Train
CID 73352383	4.9586	4.81042	Train
CID 73352385	4.9208	4.58474	Train
CID 73353516	4.6882	4.07203	Train
CID 73355382	4.1487	3.93512	Train
CID 73355383	3.8447	4.07026	Train
CID 73356935	3.8182	3.99459	Train
CID 73356936	3.9031	4.07479	Train
CID 73426406	4.762	4.04347	Train
CID 736681	3.8239	3.97687	Train
CID 7428	5.1079	4.92346	Train
CID 745079	3.699	3.47851	Train
CID 76307996	4.2811	4.00044	Train
CID 76308451	3.4949	3.52931	Train
CID 76309032	3.2468	3.09318	Train
CID 76310270	4.7258	4.33055	Train
CID 76311591	3.699	4.19822	Train
CID 76311603	4	3.49362	Train
CID 76315102	5.6216	4.57175	Train
CID 76315134	3.678	3.97018	Train
CID 76316151	4.1754	4.03689	Train
CID 76316152	4	4.19978	Train
CID 76317396	4.8268	4.10948	Train
CID 76317397	4.4597	3.87327	Train
CID 76317497	3.5258	4.20252	Train
CID 76318807	4.0593	3.85282	Train
CID 763204	3.699	3.69412	Train
CID 76320422	3.5074	3.74166	Train
CID 76322444	3.655	3.98911	Train
CID 76322445	3.6817	4.03541	Train
CID 76322482	4.6838	4.52793	Train
CID 76323583	3.3563	3.31571	Train
CID 76324847	4.4609	4.02269	Train
CID 76326917	4.5143	4.00955	Train
CID 76327084	4.4196	4.66267	Train
CID 76327085	4	4.32883	Train
CID 76328405	3.2449	4.08955	Train
CID 76329384	3.5229	4.01678	Train
CID 76330748	4	4.20686	Train
CID 76330749	4	4.32996	Train
CID 76333822	3.7878	3.9823	Train
CID 76334179	4.2741	4.04132	Train
CID 76334342	4.058	4.03413	Train
CID 76334343	4.4455	4.65923	Train
CID 76334871	3.2071	3.74204	Train
CID 76956	2.8928	3.88036	Train
CID 802112	3.699	3.60526	Train
CID 804849	5.8697	4.80071	Train
CID 84298	4.5229	3.5797	Train
CID 8456	4.3665	3.97967	Train
CID 8768	4.5317	4.61331	Train
CID 87935	3.4947	3.7806	Train
CID 8833050	4	4.34647	Train
CID 8858391	4.3372	4.29957	Train
CID 9064	4.3098	4.75836	Train
CID 92097	3.301	3.97833	Train
CID 923087	3.6198	3.92956	Train
CID 932036	4.384	4.11063	Train
CID 932147	3	3.95012	Train
CID 961456	3	4.15084	Train
CID 9813852	4.6426	4.39377	Train
CID 9826353	4.4949	4.47114	Train
CID 9878547	3.699	4.3405	Train
CID 9880352	3.699	4.14563	Train
CID 9881652	4.2441	3.92407	Train
CID 9938674	4.2757	4.17992	Train
CID 99622	3.9337	4.33489	Train
CID 9972469	4.2907	4.63285	Train
CID 9973595	4.4647	4.43775	Train
CID 9976853	5.1249	4.91626	Train
CID 9991705	4.8996	4.02528	Train
CID 9994897	4.3224	4.69674	Train
CID 9996305	3.9872	3.7588	Train
CID 10007827	4.1765	3.86353	Test
CID 10013799	4.8861	4.09246	Test
CID 10063155	4.9747	4.52954	Test
CID 10071070	4.1024	3.99241	Test
CID 10096749	4.0737	3.80551	Test
CID 10101397	4.6778	4.27227	Test
CID 10317069	5.6253	4.78653	Test
CID 10323393	4.8239	4.35773	Test
CID 10330785	4.2218	4.32173	Test
CID 10366827	5.0706	4.09507	Test
CID 10391274	3.301	3.85476	Test
CID 10412952	4.1649	3.828	Test
CID 10470916	4.7212	4.14123	Test
CID 10742	5.1337	4.3762	Test
CID 10777323	3.699	3.47024	Test
CID 107905	5.8239	4.58038	Test
CID 10831150	4.4976	4.4877	Test
CID 10885102	3.8392	4.29359	Test
CID 10952235	4.699	4.35326	Test
CID 11059652	3.969	4.26368	Test
CID 11059927	4.5528	4.39821	Test
CID 11166049	4.5229	3.90041	Test
CID 11179934	3.556	3.60723	Test
CID 11248258	4.0088	4.24782	Test
CID 11289949	4.1694	4.60754	Test
CID 11306853	4.2815	4.23233	Test
CID 11375844	3.384	4.23343	Test
CID 11432851	4.5036	4.46763	Test
CID 11486277	4.8633	4.51932	Test
CID 11537736	4.585	4.70431	Test
CID 11570897	5.0969	4.42869	Test
CID 11608303	3.7862	4.53962	Test
CID 11689770	4.983	4.21985	Test
CID 11742283	3.301	3.92135	Test
CID 11787128	4.9626	4.17733	Test
CID 119033	4	3.97442	Test
CID 11967131	4.8539	4.61553	Test
CID 1201366	4.2757	3.88489	Test
CID 1221699	4.8097	3.97409	Test
CID 1227590	4.5302	3.92595	Test
CID 12681939	4	4.00581	Test
CID 12693698	6.1612	4.49454	Test
CID 13250463	4.2218	4.16617	Test
CID 134369	3.699	4.51003	Test
CID 13596025	4.2218	3.8519	Test
CID 137388	5.061	4.95294	Test
CID 13888132	4.6968	4.60946	Test
CID 13939416	5.3625	4.80186	Test
CID 14158117	4	4.02189	Test
CID 145937	4.6404	4.94623	Test
CID 15059606	4.1146	3.91903	Test
CID 1548910	4.0223	4.27405	Test
CID 1549041	4.3907	4.19737	Test
CID 158516	4.129	3.67621	Test
CID 160467	4.4949	4.19625	Test
CID 16091684	6.1135	4.22467	Test
CID 16104870	4.7011	4.5793	Test
CID 16216276	4.1427	3.58677	Test
CID 16216401	3.8962	3.48098	Test
CID 16757397	4.9914	4.66933	Test
CID 1712706	4	4.30927	Test
CID 176096	4.8386	4.65878	Test
CID 188977	3.6517	3.87053	Test
CID 196402	3.699	3.53516	Test
CID 21320451	5.0088	4.73098	Test
CID 21330908	3.4954	4.0016	Test
CID 21580275	4.4815	3.97295	Test
CID 21594638	4.0967	3.76172	Test
CID 21676382	5.6383	4.51887	Test
CID 21778116	4.6073	4.93401	Test
CID 223681	3.8102	3.5473	Test
CID 23425626	4.1871	3.9137	Test
CID 23425627	4.3665	4.00763	Test
CID 23509265	3.988	4.39111	Test
CID 23655529	4.1135	4.03467	Test
CID 23655533	4.0132	3.98576	Test
CID 23655740	4.0506	4.02365	Test
CID 24180556	5.0804	4.48565	Test
CID 24754925	4.6108	4.07974	Test
CID 24762915	5.1487	4.44789	Test
CID 24770034	5.2147	4.89456	Test
CID 24770503	5.3372	4.67545	Test
CID 24770576	5.2007	4.79905	Test
CID 24879474	4.9508	4.55299	Test
CID 24896701	3.5143	3.93902	Test
CID 24939262	3	3.54349	Test
CID 25157859	4.5969	4.47728	Test
CID 25158167	4.5058	4.49367	Test
CID 25213353	4.0085	4.45506	Test
CID 25213587	3.699	3.97939	Test
CID 253300	4.965	4.67224	Test
CID 267579	3.8459	3.89395	Test
CID 270038	4.699	4.53868	Test
CID 2754016	3.2843	3.28438	Test
CID 2826482	3.6238	3.86931	Test
CID 2834993	3.1979	3.47374	Test
CID 2940445	3.7467	3.56087	Test
CID 3469	5.3706	4.82382	Test
CID 36055	4.8162	4.7655	Test
CID 362329	4.2218	4.1671	Test
CID 3848	4	3.93194	Test
CID 40634	4.4837	4.17194	Test
CID 42605111	4.6592	4.58745	Test
CID 42638802	3.9767	4.18066	Test
CID 42642800	4.1129	3.88502	Test
CID 44138777	3.699	4.26713	Test
CID 44139042	3.699	4.358	Test
CID 44219681	5.1367	4.63766	Test
CID 44241573	3.301	3.91799	Test
CID 44321685	4.3002	4.22026	Test
CID 44321714	3.7397	4.13869	Test
CID 44361325	4.3242	4.43589	Test
CID 44390896	4.4893	4.60717	Test
CID 44399438	3.9245	4.10652	Test
CID 44399497	4.7747	4.06901	Test
CID 44418788	4.8297	4.60477	Test
CID 44419311	4	4.73007	Test
CID 44421289	4.0605	4.33447	Test
CID 44425451	4.301	4.71206	Test
CID 44425452	4.3635	4.34433	Test
CID 44425457	4.9219	4.9814	Test
CID 44432252	5.3468	4.63216	Test
CID 44452396	4.3665	4.6017	Test
CID 44452646	3.8539	3.51629	Test
CID 44452713	4.1308	4.33325	Test
CID 44478681	3.301	4.30938	Test
CID 44512370	4.4855	4.28921	Test
CID 44537906	2.857	3.36543	Test
CID 44559248	4.041	4.10062	Test
CID 44559660	3.3072	4.17651	Test
CID 44566911	4.1599	4.32298	Test
CID 44567296	4.3458	3.97466	Test
CID 44575386	4.1675	4.26453	Test
CID 44575750	4.3036	4.26953	Test
CID 44581360	4	4.00824	Test
CID 44583434	3.3468	3.73031	Test
CID 44583925	4.209	4.55297	Test
CID 44587442	4.4962	3.99304	Test
CID 44593378	4.5229	3.7848	Test
CID 44632492	4.0555	4.23079	Test
CID 4465090	3.5591	3.66806	Test
CID 45101465	3.8948	3.76271	Test
CID 45267452	3.301	3.72705	Test
CID 45268317	3.301	3.18081	Test
CID 45271717	3.301	3.23717	Test
CID 45273387	4.6931	4.50189	Test
CID 4534	5.2076	4.53832	Test
CID 45482317	4.0458	4.37494	Test
CID 46184560	4.4672	3.95949	Test
CID 46211198	4.4559	4.35889	Test
CID 46704106	3.9252	4.06087	Test
CID 467295	5.5528	4.57128	Test
CID 46853903	4.2218	4.22693	Test
CID 46854059	4.2218	4.71229	Test
CID 46856003	5.1675	4.0379	Test
CID 46856153	4.2218	4.4082	Test
CID 46879766	4.9788	4.28173	Test
CID 46883067	3.301	4.31542	Test
CID 46918733	4.301	4.36203	Test
CID 49797993	4.2104	4.43737	Test
CID 49798008	4.059	4.82786	Test
CID 49798036	3.6519	4.18597	Test
CID 49800188	4.1911	3.85675	Test
CID 49837276	4.3458	3.97672	Test
CID 49837380	4.2111	4.2655	Test
CID 49840040	5.4559	4.46695	Test
CID 49866358	4.1605	3.7861	Test
CID 49866359	4	3.92054	Test
CID 50899164	4.1938	4.3486	Test
CID 50901251	3.699	3.92523	Test
CID 50994839	3.4895	3.87669	Test
CID 51354813	4.6308	4.4451	Test
CID 5280443	4	4.52292	Test
CID 5280536	4.1898	4.28759	Test
CID 5280804	4.8297	4.73716	Test
CID 5281697	4.6191	4.64001	Test
CID 5281767	4.5114	5.0638	Test
CID 5281780	4.5391	4.44798	Test
CID 5284648	4.518	4.46205	Test
CID 52946192	3.9957	4.19117	Test
CID 52947990	4.3134	4.20726	Test
CID 52953032	4.5766	4.27804	Test
CID 5316860	3.301	3.65458	Test
CID 5317238	4.8761	4.18688	Test
CID 5318767	4	4.57511	Test
CID 5320256	3.9318	3.91472	Test
CID 53233246	4.7324	4.67352	Test
CID 5323504	3.116	4.18825	Test
CID 5332132	3.699	3.48431	Test
CID 53357199	5.5229	5.2248	Test
CID 5338977	4.0255	3.85228	Test
CID 5372945	4.1972	4.51577	Test
CID 5375964	3	3.9082	Test
CID 5391130	3.699	3.49263	Test
CID 5406157	4.342	4.23455	Test
CID 542711	4.2676	3.89196	Test
CID 54578253	5.2083	4.12947	Test
CID 54578257	5.1733	4.6504	Test
CID 54582856	4.3368	4.5383	Test
CID 54583865	4.3749	4.42869	Test
CID 54585601	4	3.87571	Test
CID 54586593	4	3.91184	Test
CID 54587609	4	3.84607	Test
CID 54587807	4.4104	4.45771	Test
CID 5468010	4.2218	4.53526	Test
CID 547	4.585	4.38868	Test
CID 5472258	5.9469	3.84458	Test
CID 54726724	4.7282	4.32589	Test
CID 54728157	5.6402	4.89053	Test
CID 54729516	4.342	4.54645	Test
CID 54738772	5.6478	4.44554	Test
CID 54738877	4.0097	3.86706	Test
CID 5490884	4.9914	4.15325	Test
CID 56666367	5.1549	5.17127	Test
CID 56835101	4.3188	4.32544	Test
CID 56835119	4.7258	4.6214	Test
CID 56925976	4.8928	3.97489	Test
CID 56928517	4.2387	3.66974	Test
CID 56935668	4.2955	4.69269	Test
CID 56935777	4	3.24424	Test
CID 57381747	3.5817	3.73396	Test
CID 57392787	2.7936	3.51157	Test
CID 57393076	5.1135	4.57753	Test
CID 57394536	3.8359	3.34582	Test
CID 57394579	3.8239	3.84394	Test
CID 57396559	4.5784	4.63804	Test
CID 57397242	3.699	4.34496	Test
CID 57403299	4.0757	4.24436	Test
CID 57403300	4.1192	4.18047	Test
CID 5746	3.699	3.87749	Test
CID 5910817	4.9031	4.20031	Test
CID 60201982	3.6362	3.81354	Test
CID 60201985	4.3747	3.93529	Test
CID 6112	3.3979	3.27191	Test
CID 636767	4.2441	4.07758	Test
CID 637775	4.1805	4.2897	Test
CID 6439175	4.9957	4.45508	Test
CID 6449879	4.9208	4.46579	Test
CID 6474901	4.8962	4.51684	Test
CID 6476333	4.699	4.7387	Test
CID 6477524	5.6383	5.25663	Test
CID 65017831	3.699	3.27221	Test
CID 65017911	3.699	3.59901	Test
CID 6693	2.7511	3.80148	Test
CID 679479	4.308	3.61784	Test
CID 689043	4.7547	4.5449	Test
CID 68976271	4.2132	4.68545	Test
CID 693366	4.1549	3.94837	Test
CID 701011	3.5768	3.95314	Test
CID 7060852	4.041	4.36857	Test
CID 70682462	4.1549	3.81062	Test
CID 70686690	4.1549	3.84438	Test
CID 70686938	3.9805	3.78474	Test
CID 70688790	4.1549	3.94154	Test
CID 70693290	5.2823	4.80727	Test
CID 70694509	3.301	3.85659	Test
CID 70697334	3.942	3.89994	Test
CID 71450620	4.3979	4.5723	Test
CID 71452461	4.8297	4.64582	Test
CID 71454322	4.6737	4.08575	Test
CID 71455974	4.8069	4.66168	Test
CID 71456071	3.6021	3.55778	Test
CID 71461406	4.9666	4.7527	Test
CID 71461948	4.8508	4.3533	Test
CID 71508434	4.5017	3.62842	Test
CID 71508485	4.382	4.34969	Test
CID 71508489	4.301	4.22394	Test
CID 71517037	3.7207	4.24185	Test
CID 71519336	4.199	3.79141	Test
CID 71519490	4.0529	4.34855	Test
CID 71519491	4.1163	3.84336	Test
CID 71521886	4.3179	4.23617	Test
CID 71523997	4.4179	4.1502	Test
CID 71524307	4.2434	4.47242	Test
CID 71560298	5.6383	5.15306	Test
CID 71560300	5.3188	5.37823	Test
CID 71575067	3.7399	3.77519	Test
CID 71575159	3.5229	3.70221	Test
CID 71607789	3.9666	4.18483	Test
CID 71681235	3.699	3.81037	Test
CID 71681390	3.699	3.76463	Test
CID 71681706	4.9172	4.93289	Test
CID 71699189	4.5834	4.25998	Test
CID 71699193	4.3288	4.30495	Test
CID 71716780	3.8342	4.24802	Test
CID 71717505	4.1487	4.23969	Test
CID 71719510	4.3325	4.3887	Test
CID 71719813	4.3768	3.99138	Test
CID 71720360	3.5759	3.86916	Test
CID 71769553	5.0809	4.87485	Test
CID 71769685	4.9706	5.02273	Test
CID 72	4.5686	4.17889	Test
CID 72192261	4.0521	4.16698	Test
CID 72192262	4.0209	4.17867	Test
CID 72204384	4.449	4.39987	Test
CID 72204575	4.1658	4.39006	Test
CID 72204579	4.6426	4.49987	Test
CID 72204580	5.1385	4.55022	Test
CID 72204774	4.2928	4.50994	Test
CID 72204951	4.3204	4.41957	Test
CID 72204955	4.543	4.47942	Test
CID 72277	4.7905	4.07197	Test
CID 72545289	4.007	3.83794	Test
CID 72545534	4.3429	4.14218	Test
CID 72545536	4.1221	4.12272	Test
CID 72697013	4.7328	4.32613	Test
CID 72707591	3.8239	4.40612	Test
CID 72707660	3.0506	3.66146	Test
CID 72707736	3.0315	3.48707	Test
CID 72707739	3.3372	3.8011	Test
CID 72947660	5.8239	4.94136	Test
CID 72947664	5.3979	4.85212	Test
CID 73346286	4.4949	4.3098	Test
CID 73349331	3.7305	4.07181	Test
CID 73352384	3.8794	3.76213	Test
CID 73355384	3.7825	4.21042	Test
CID 73355385	3.9208	4.06029	Test
CID 735254	4.0468	4.19082	Test
CID 73891091	5.0757	3.93881	Test
CID 76307974	4.2083	3.99504	Test
CID 76307975	3.7809	3.9863	Test
CID 76308955	4.2101	4.16154	Test
CID 76316150	4.3898	4.07574	Test
CID 76317496	4.7077	4.47752	Test
CID 76319333	4.0706	3.98025	Test
CID 76320423	3.1748	3.61273	Test
CID 76322986	3.5686	3.5443	Test
CID 76327613	3.447	3.9884	Test
CID 76329677	4	3.47878	Test
CID 76334341	4.154	4.15565	Test
CID 76334872	3.2224	3.88192	Test
CID 779368	3.5341	4.01174	Test
CID 85405	4.6925	4.77223	Test
CID 868511	4.1765	4.30134	Test
CID 913709	3	4.10985	Test
CID 92267	3.4895	4.06505	Test
CID 92525	4.8539	5.11722	Test
CID 9817274	4.4559	4.45193	Test

## Sheet: Table S3
Table S3. Compounds and scavenging activity of DPPH radical (IC50).
CID	IC50 (µM)	REFERENCE
CID 10007827	66.6	PMID: 18249541
CID 10013799	13	PMID: 24080105
CID 10029906	53	PMID: 11708933
CID 10030540	67.7	PMID: 18249541
CID 10063155	10.6	PMID: 23726032
CID 10071070	79	PMID: 17896816
CID 10072723	69	PMID: 18249541
CID 10082261	14.2	PMID: 24080105
CID 10096749	84.4	PMID: 18249541
CID 10101397	21	PMID: 10843586
CID 101459	4000	PMID: 19502068
CID 10150350	89.1	PMID: 12182869
CID 10178463	142	PMID: 9599270
CID 10193699	0.03	PMID: 22385675
CID 10215268	83.4	PMID: 12350144
CID 10215621	66	PMID: 12350144
CID 10221179	56.4	PMID: 17253844
CID 10264116	23.8	PMID: 24080105
CID 10317069	2.37	PMID: 23434138
CID 10323393	15	PMID: 15974621
CID 10328286	8	PMID: 10843586
CID 10330785	60	PMID: 20452101
CID 10339712	100	PMID: 16908141
CID 10346004	20.1	PMID: 10096857
CID 10348496	75.6	PMID: 18249541
CID 10350153	23.8	PMID: 11520237
CID 10365840	500	PMID: 19450986
CID 10366827	8.5	PMID: 11141124
CID 10370732	85.1	PMID: 18249541
CID 10377204	165	PMID: 22280820
CID 10385745	110.2	PMID: 21216503
CID 10387631	13	PMID: 15974621
CID 10391274	500	PMID: 19450986
CID 10402927	35.9	PMID: 14698182
CID 10412952	68.4	PMID: 18249541
CID 10414856	400	PMID: 15787435
CID 10419684	0.6	PMID: 12027772
CID 10423558	7.8	PMID: 12932126
CID 10425731	31	PMID: 12182869
CID 10433425	80.3	PMID: 18249541
CID 10435297	44	PMID: 11708933
CID 10436	0.8	PMID: 18281952
CID 10450920	12.97	PMID: 23434138
CID 10456516	9.4	PMID: 18020420
CID 10458989	77.7	PMID: 18249541
CID 10470916	19	PMID: 20230038
CID 10480940	18.64	PMID: 19201199
CID 1057	37.8	PMID: 12350144
CID 10742	7.3	PMID: 16713262
CID 10777323	200	PMID: 23711920
CID 107905	1.5	PMID: 22377672
CID 10810596	912	PMID: 17896816
CID 10810597	899	PMID: 17896816
CID 10819104	390	PMID: 22652051
CID 10831150	31.8	PMID: 16203143
CID 10858	1000	PMID: 22832313
CID 10873461	30	PMID: 15844957
CID 10885102	144.8	PMID: 12932126
CID 10906376	158	PMID: 11708933
CID 10907594	125	PMID: 15787435
CID 10929258	23.5	PMID: 12880319
CID 10947808	34	PMID: 11708933
CID 10951440	12.9	PMID: 12880319
CID 10952235	20	PMID: 11708933
CID 11005695	50	PMID: 11708933
CID 11005957	66	PMID: 11708933
CID 1101245	7.27	PMID: 22626550
CID 11015261	30	PMID: 15844957
CID 11035383	5.1	PMID: 21038854
CID 11039407	55	PMID: 11708933
CID 11042199	62.6	PMID: 11929285
CID 11059652	107.4	PMID: 12932126
CID 11059927	28	PMID: 11708933
CID 11077195	57	PMID: 11708933
CID 11103410	33	PMID: 11708933
CID 11114773	100	PMID: 12608850
CID 11116966	22.5	PMID: 18281952
CID 11134199	200	PMID: 22209460
CID 11135781	13.3	PMID: 12608850
CID 11153672	21.3	PMID: 16203143
CID 11166049	30	PMID: 15844957
CID 11179934	278	PMID: 15620237
CID 11181364	15.2	PMID: 15620243
CID 11188197	362	PMID: 15787452
CID 11203960	30	PMID: 15844957
CID 11224109	625	PMID: 19464173
CID 11236329	38.7	PMID: 15787435
CID 11247668	20	PMID: 15974621
CID 11248258	98	PMID: 15387642
CID 11284880	64	PMID: 15787435
CID 11289949	67.7	PMID: 23282106
CID 11306853	52.3	PMID: 15568781
CID 11330069	500	PMID: 15620237
CID 11365276	17.81	PMID: 14575443
CID 11365823	11.4	PMID: 15620243
CID 11375844	413	PMID: 15974621
CID 11381926	59.84	DOI: 10.1007/s00044-012-0247-z
CID 11383736	15.5	PMID: 17602526
CID 11391937	13.8	PMID: 24080105
CID 11398079	33	PMID: 15974621
CID 11398272	380	PMID: 15620237
CID 11426529	24.9	PMID: 15911250
CID 11432381	194	PMID: 15620237
CID 11432851	31.36	PMID: 14575443
CID 11433035	25.45	PMID: 14575443
CID 11435579	1250000	PMID: 22385675
CID 11442705	34	PMID: 15387642
CID 11443924	55.1	PMID: 15568781
CID 11466771	599	PMID: 15974621
CID 11476782	95	PMID: 15387642
CID 11486277	13.7	PMID: 16203143
CID 11501	76.05	PMID: 17896816
CID 115252	569	PMID: 17896816
CID 11537736	26	PMID: 16562825
CID 11564573	11.8	PMID: 23357310
CID 11570897	8	PMID: 16124783
CID 11588549	100	PMID: 21216503
CID 11608303	163.6	PMID: 22832313
CID 11611248	17.4	PMID: 16203143
CID 11654279	13	PMID: 18337107
CID 11655574	37	PMID: 16562825
CID 11673743	290	PMID: 16124757
CID 11682371	10.6	PMID: 18281952
CID 11689770	10.4	PMID: 16203143
CID 11704704	12	PMID: 18337107
CID 11719580	18	PMID: 16124783
CID 11724114	21.3	PMID: 12182869
CID 11742283	500	PMID: 19450986
CID 11752938	500	PMID: 15620237
CID 11758702	322	PMID: 21174408
CID 11771413	3.1	PMID: 21038854
CID 11775863	60	PMID: 20452101
CID 11780726	21.64	PMID: 19481947
CID 11787128	10.9	PMID: 15620243
CID 11808877	46	PMID: 21958738
CID 119033	100	PMID: 21546250
CID 11967131	14	PMID: 19674906
CID 11968471	24	PMID: 17125238
CID 1201366	53	PMID: 19502068
CID 1203	10	PMID: 18020420
CID 1205040	2.85	PMID: 17197183
CID 1221699	15.5	PMID: 23117172
CID 12239518	466.46	DOI: 10.1007/s00044-011-9648-7
CID 1227590	29.5	PMID: 24185379
CID 1228188	4000	PMID: 19502068
CID 12315415	1000	PMID: 18281952
CID 12329610	200	PMID: 23711920
CID 12396823	4	PMID: 21038854
CID 12396824	100	PMID: 21038854
CID 124886	96	PMID: 19502068
CID 12662957	351.1	DOI: 10.1007/s00044-010-9384-4
CID 12681939	100	PMID: 17967537
CID 126887	16.4	PMID: 17125238
CID 12693698	0.69	PMID: 19481947
CID 12693700	21.46	PMID: 19481947
CID 1276528	11.97	PMID: 17197183
CID 1281690	14.53	PMID: 22626550
CID 12855	200	PMID: 23711920
CID 128889	30	PMID: 15844957
CID 12986066	2.24	PMID: 23434138
CID 130976	17.66	PMID: 19201199
CID 13250463	60	PMID: 20452101
CID 13250466	60	PMID: 20452101
CID 13254473	63.3	PMID: 20121165
CID 134369	200	PMID: 22209460
CID 13508053	143.1	PMID: 23117172
CID 13508055	30.3	PMID: 23117172
CID 13508060	57.2	PMID: 23117172
CID 13508061	49	PMID: 23117172
CID 13567735	230.7	DOI: 10.1007/s00044-010-9384-4
CID 13596025	60	PMID: 20452101
CID 137388	8.69	PMID: 19201199
CID 13760716	36.8	PMID: 24269515
CID 13857929	60	PMID: 20452101
CID 13857937	15	PMID: 20452101
CID 13888132	20.1	PMID: 17125238
CID 13888133	20.6	PMID: 17125238
CID 13919535	500	PMID: 22652051
CID 13939416	4.34	PMID: 19481947
CID 13962928	46.3	PMID: 21546250
CID 13995449	20.3	PMID: 11473417
CID 14034194	16.5	PMID: 19674906
CID 14079440	100	PMID: 17967537
CID 14158117	100	PMID: 21546250
CID 14237599	9.5	PMID: 24080105
CID 14332450	68.1	PMID: 14640528
CID 14353469	21.8	PMID: 17253844
CID 14407195	9.2	PMID: 23726032
CID 14454290	84	PMID: 19502068
CID 14467636	63	PMID: 21084196
CID 14467638	55	PMID: 21084196
CID 14467641	111	PMID: 21084196
CID 14578495	9.7	PMID: 15780608
CID 145937	22.89	PMID: 19201199
CID 14840962	21.9	PMID: 23357310
CID 14887605	58.2	PMID: 14640528
CID 149806	28.5	PMID: 24269515
CID 14985	63.57	PMID: 15270574
CID 15059606	76.8	PMID: 21429753
CID 15126652	5.69	PMID: 19481947
CID 15200541	795.8	PMID: 18281952
CID 15307521	200	PMID: 22071299
CID 1548910	95	PMID: 9599270
CID 1549041	40.67	PMID: 21843909
CID 1550234	51.85	DOI: 10.1007/s00044-010-9521-0
CID 1551384	100	DOI: 10.1007/s00044-010-9521-0
CID 1551387	100	DOI: 10.1007/s00044-010-9521-0
CID 15556234	3.8	PMID: 18281952
CID 158516	74.3	PMID: 20584613
CID 15956	990.57	PMID: 22079755
CID 16040016	29	PMID: 9599270
CID 160467	32	PMID: 19476340
CID 16079989	49.2	PMID: 17046255
CID 16083179	51.4	PMID: 16933884
CID 16091684	0.77	PMID: 23466227
CID 16104870	19.9	PMID: 17253844
CID 16104871	200	PMID: 17253844
CID 16104872	21	PMID: 17253844
CID 16119668	61.2	PMID: 23282106
CID 161336	56	PMID: 15568781
CID 16216276	72	PMID: 17343407
CID 16216400	201	PMID: 17343407
CID 16216401	127	PMID: 17343407
CID 16216402	45	PMID: 17343407
CID 16216594	26.8	PMID: 17112729
CID 163095	1000	PMID: 18281952
CID 16655435	84.6	DOI: 10.1007/s00044-010-9384-4
CID 16757395	18.5	PMID: 17602526
CID 16757396	10.5	PMID: 17602526
CID 16757397	10.2	PMID: 17602526
CID 16757398	24	PMID: 17602526
CID 16896284	100	DOI: 10.1007/s00044-010-9521-0
CID 1712706	100	DOI: 10.1007/s00044-010-9521-0
CID 1714173	100	DOI: 10.1007/s00044-010-9521-0
CID 1716231	676	PMID: 24185379
CID 17335	4000	PMID: 19502068
CID 17391248	100	DOI: 10.1007/s00044-010-9521-0
CID 17574027	439.47	PMID: 23206864
CID 17586047	616.2	DOI: 10.1007/s00044-013-0586-4
CID 176096	14.5	PMID: 17253844
CID 17621068	63.87	PMID: 23993673
CID 18100	35.8	PMID: 18088100
CID 185617	26.78	PMID: 23177255
CID 185766	11	PMID: 16124783
CID 188287	1.4	PMID: 12027772
CID 188977	223	PMID: 23356964
CID 1935	1000	PMID: 22981331
CID 19578261	100	DOI: 10.1007/s00044-010-9521-0
CID 196402	200	PMID: 22209460
CID 20055968	100	PMID: 22377672
CID 20396990	84	PMID: 20621727
CID 21104932	14	PMID: 23117172
CID 21178082	3.14	PMID: 22626550
CID 21320451	9.8	PMID: 18163588
CID 21330908	319.62	PMID: 20828889
CID 2141	100	PMID: 19502068
CID 21575482	100	PMID: 20825224
CID 21577856	60.9	PMID: 19296617
CID 21580275	33	PMID: 21216503
CID 21586651	51	PMID: 17896816
CID 21589503	32.66	PMID: 14575443
CID 21594638	80.03	PMID: 20621497
CID 21599888	97	PMID: 21084196
CID 21606617	100	PMID: 12608850
CID 21676382	2.3	PMID: 18020420
CID 21676383	2.5	PMID: 18020420
CID 21722016	41.6	PMID: 14640528
CID 21778115	8.1	PMID: 17602526
CID 21778116	24.7	PMID: 17602526
CID 219800	28.1	PMID: 22832313
CID 219809	39.9	PMID: 24269515
CID 2202	60	PMID: 20452101
CID 223681	154.8	DOI: 10.1007/s00044-010-9384-4
CID 22833196	15.1	PMID: 18088100
CID 22909786	178.6	PMID: 12182869
CID 231320	182.6	DOI: 10.1007/s00044-010-9384-4
CID 23250007	3.34	PMID: 23434138
CID 23329295	362.1	PMID: 22832313
CID 23425626	65	PMID: 17896816
CID 23425627	43	PMID: 17896816
CID 23426771	8.5	PMID: 17602526
CID 23509264	109.7	PMID: 20621727
CID 23509265	102.8	PMID: 20621727
CID 23634522	75	PMID: 17896816
CID 23655345	79	PMID: 17896816
CID 23655528	88	PMID: 17896816
CID 23655529	77	PMID: 17896816
CID 23655530	99	PMID: 17896816
CID 23655531	102	PMID: 17896816
CID 23655532	623	PMID: 17896816
CID 23655533	97	PMID: 17896816
CID 23655737	79	PMID: 17896816
CID 23655738	86	PMID: 17896816
CID 23655739	79	PMID: 17896816
CID 23655740	89	PMID: 17896816
CID 23661682	200	PMID: 19375195
CID 23797809	1.66	PMID: 22626550
CID 23798784	943.06	DOI: 10.1007/s00044-013-0586-4
CID 23844069	298	PMID: 15787435
CID 24148517	11.6	PMID: 23046341
CID 24180539	7.78	PMID: 17693086
CID 24180556	8.31	PMID: 17693086
CID 246558	31.26	PMID: 22626550
CID 24754925	24.5	PMID: 17967537
CID 24761035	4.1	PMID: 18163588
CID 24761045	8.1	PMID: 18088100
CID 24762915	7.1	PMID: 18020420
CID 24762916	6.7	PMID: 18020420
CID 24770033	6.8	PMID: 18088100
CID 24770034	6.1	PMID: 18088100
CID 24770502	4.3	PMID: 18163588
CID 24770503	4.6	PMID: 18163588
CID 24770504	4.4	PMID: 18163588
CID 24770505	6.2	PMID: 18163588
CID 24770506	4.1	PMID: 18163588
CID 24770576	6.3	PMID: 18163588
CID 24770577	2.6	PMID: 18163588
CID 24770578	8.5	PMID: 18163588
CID 24816381	15.1	PMID: 23357310
CID 24828114	12.8	PMID: 23357310
CID 24850196	55.3	PMID: 18281952
CID 24862577	291.3	PMID: 18281952
CID 24879405	15	PMID: 18314960
CID 24879406	11.6	PMID: 18314960
CID 24879474	11.2	PMID: 18314960
CID 24879475	10.5	PMID: 18314960
CID 24895134	52.5	PMID: 17448664
CID 24895199	53.2	PMID: 17448664
CID 24896701	306	PMID: 21174408
CID 24939262	1000	PMID: 18337107
CID 24939263	462	PMID: 18337107
CID 24987042	27.15	PMID: 17967537
CID 25010554	114.1	PMID: 18249541
CID 25104522	12	PMID: 16124783
CID 25113729	49	PMID: 20936791
CID 25157858	31.8	PMID: 19007183
CID 25157859	25.3	PMID: 19007183
CID 25157861	34.6	PMID: 19007183
CID 25157862	35.3	PMID: 19007183
CID 25157863	29.5	PMID: 19007183
CID 25158167	31.2	PMID: 19007183
CID 2519	100	PMID: 22377672
CID 25194979	184.55	PMID: 19375195
CID 25213353	98.06	PMID: 19375195
CID 25213354	47.87	PMID: 19375195
CID 25213355	127.93	PMID: 19375195
CID 25213356	69	PMID: 19375195
CID 25213357	126.63	PMID: 19375195
CID 25213358	200	PMID: 19375195
CID 25213587	200	PMID: 19375195
CID 25213588	43.59	PMID: 19375195
CID 25213589	200	PMID: 19375195
CID 25266037	43.8	PMID: 17448664
CID 253300	10.84	PMID: 19481947
CID 255057	186.7	DOI: 10.1007/s00044-010-9384-4
CID 259632	57.4	PMID: 19481947
CID 262164	1000	PMID: 22832313
CID 26444	4000	PMID: 19502068
CID 267579	142.6	DOI: 10.1007/s00044-010-9384-4
CID 270038	10.83	DOI: 10.1007/s00044-011-9648-7
CID 270039	20.82	DOI: 10.1007/s00044-011-9648-7
CID 2733208	123	PMID: 22385675
CID 2754016	519.67	DOI: 10.1007/s00044-013-0586-4
CID 2754024	815.71	DOI: 10.1007/s00044-013-0586-4
CID 2764	200	PMID: 23711920
CID 2787704	23.3	PMID: 24185379
CID 2826482	237.8	DOI: 10.1007/s00044-010-9384-4
CID 2828680	486.82	DOI: 10.1007/s00044-013-0586-4
CID 2834993	634.06	DOI: 10.1007/s00044-013-0586-4
CID 2838890	512.17	DOI: 10.1007/s00044-013-0586-4
CID 2839009	739.44	DOI: 10.1007/s00044-013-0586-4
CID 2839135	227.56	DOI: 10.1007/s00044-013-0586-4
CID 289	36	PMID: 22995623
CID 2940445	179.2	DOI: 10.1007/s00044-010-9384-4
CID 3008868	8.28	PMID: 19201199
CID 3084296	328	PMID: 23356964
CID 3086528	200	PMID: 17253844
CID 31404	90.9	PMID: 17253844
CID 31553	284	PMID: 22503365
CID 3314	27.5	PMID: 18314960
CID 3355050	242.49	PMID: 20828889
CID 345686	200	PMID: 23711920
CID 3469	4.26	PMID: 12027755
CID 3495982	4000	PMID: 19502068
CID 36055	15.27	PMID: 22626550
CID 362329	60	PMID: 20452101
CID 370	33.92	PMID: 21028890
CID 3802178	87.42	PMID: 23993673
CID 3831191	23.99	PMID: 20621497
CID 3840	1.45	PMID: 22071299
CID 3848	100	PMID: 21546250
CID 3928772	4000	PMID: 19502068
CID 4004523	107.4	PMID: 23117172
CID 4021	29.3	PMID: 14552780
CID 402956	31.68	PMID: 22626550
CID 407032	60	PMID: 20452101
CID 4161478	1000	PMID: 22832313
CID 4237287	87.4	PMID: 23117172
CID 42605111	21.92	PMID: 19481947
CID 42638802	105.51	PMID: 19271716
CID 42638803	663.13	PMID: 19271716
CID 42638804	486.38	PMID: 19271716
CID 42638805	730.99	PMID: 19271716
CID 42638806	102.9	PMID: 19271716
CID 42639496	236.8	PMID: 19296617
CID 42639502	281.1	PMID: 19296617
CID 42642800	77.1	PMID: 21216503
CID 436659	60	PMID: 20452101
CID 43797805	230	PMID: 22280820
CID 44093	43	PMID: 19692149
CID 440991	66.3	PMID: 12932126
CID 44138777	200	PMID: 19375195
CID 44138908	200	PMID: 19375195
CID 44138909	200	PMID: 19375195
CID 44138910	140.96	PMID: 19375195
CID 44139042	200	PMID: 19375195
CID 44139044	200	PMID: 19375195
CID 442009	114	PMID: 12350144
CID 44219681	7.3	PMID: 19362850
CID 44230016	15.1	PMID: 24080105
CID 44241573	500	PMID: 19450986
CID 44241592	25.66	PMID: 19481947
CID 442510	612	PMID: 19464173
CID 442675	5.1	PMID: 18020420
CID 44321330	300	PMID: 12182869
CID 44321685	50.1	PMID: 12182869
CID 44321706	82.2	PMID: 12182869
CID 44321707	161.7	PMID: 12182869
CID 44321708	300	PMID: 12182869
CID 44321714	182.1	PMID: 12182869
CID 44356777	400	PMID: 11708933
CID 44361324	73.4	PMID: 14698182
CID 44361325	47.4	PMID: 14698182
CID 44361579	69.5	PMID: 14698182
CID 44361591	70.6	PMID: 14698182
CID 44390839	18.96	PMID: 15780608
CID 44390895	15.45	PMID: 15780608
CID 44390896	32.41	PMID: 15780608
CID 44399283	21.7	PMID: 15911250
CID 44399287	118.5	PMID: 15911250
CID 44399367	24.8	PMID: 15911250
CID 44399373	213.9	PMID: 15911250
CID 44399392	66.4	PMID: 15911250
CID 44399410	42.9	PMID: 15911250
CID 44399438	119	PMID: 15911250
CID 44399497	16.8	PMID: 15911250
CID 44399510	80.8	PMID: 15911250
CID 44399514	104.5	PMID: 15911250
CID 44399572	40.1	PMID: 15911250
CID 44405862	200	PMID: 16203143
CID 44405880	200	PMID: 16203143
CID 44410484	100	PMID: 16488146
CID 44410486	100	PMID: 16488146
CID 44418770	40.3	PMID: 17253844
CID 44418788	16.2	PMID: 17253844
CID 44419311	100	PMID: 16908141
CID 44419312	100	PMID: 16908141
CID 44421289	87	PMID: 17343407
CID 44421292	132	PMID: 17343407
CID 44421293	55	PMID: 17343407
CID 44421295	147	PMID: 17343407
CID 44423083	30	PMID: 15844957
CID 44423248	9.8	PMID: 17112729
CID 44423249	13.2	PMID: 17112729
CID 44423250	24.9	PMID: 17112729
CID 44423602	141.6	DOI: 10.1007/s00044-013-0506-7
CID 44425451	50	PMID: 17197183
CID 44425452	43.3	PMID: 17197183
CID 44425453	17.89	PMID: 17197183
CID 44425454	4.08	PMID: 17197183
CID 44425455	9.8	PMID: 17197183
CID 44425457	11.97	PMID: 17197183
CID 44425458	17.57	PMID: 17197183
CID 44425459	32.13	PMID: 17197183
CID 44427222	200	PMID: 22209460
CID 44429050	52.8	PMID: 17448664
CID 44429837	20	PMID: 16124783
CID 44432251	8.3	PMID: 17196384
CID 44432252	4.5	PMID: 17196384
CID 44437163	21.9	PMID: 17765551
CID 44437164	9.67	PMID: 17765551
CID 44437165	16.11	PMID: 17765551
CID 44437166	19.64	PMID: 17765551
CID 44443271	30.76	PMID: 17967537
CID 44443273	24.3	PMID: 17967537
CID 44443275	25.44	PMID: 17967537
CID 44443280	100	PMID: 17967537
CID 44445553	98	PMID: 17896816
CID 44445554	1003	PMID: 17896816
CID 44445556	60	PMID: 17896816
CID 44445800	4.3	PMID: 22377672
CID 44447175	73	PMID: 18249541
CID 44447177	176.8	PMID: 18249541
CID 44452395	55	PMID: 18337107
CID 44452396	43	PMID: 18337107
CID 44452398	30	PMID: 18337107
CID 44452425	26	PMID: 18337107
CID 44452645	605	PMID: 18337107
CID 44452646	140	PMID: 18337107
CID 44452647	271	PMID: 18337107
CID 44452667	1000	PMID: 18337107
CID 44452668	271	PMID: 18337107
CID 44452689	1000	PMID: 18337107
CID 44452713	74	PMID: 18337107
CID 44478418	500	PMID: 19685913
CID 44478681	500	PMID: 19685913
CID 44478682	500	PMID: 19685913
CID 44511362	420	PMID: 19464173
CID 44512370	32.7	PMID: 22079755
CID 44512371	30.49	PMID: 22079755
CID 44514059	8.7	PMID: 19848432
CID 445154	94	PMID: 23291121
CID 44537906	1390	PMID: 19502068
CID 44558989	19.8	PMID: 10096857
CID 44559222	12	PMID: 16124783
CID 44559248	91	PMID: 16124757
CID 44559252	234	PMID: 16124757
CID 44559516	2960	PMID: 15270574
CID 44559517	5870	PMID: 15270574
CID 44559518	5630	PMID: 15270574
CID 44559525	3280	PMID: 15270574
CID 44559526	5800	PMID: 15270574
CID 44559527	6700	PMID: 15270574
CID 44559633	50.9	PMID: 15568781
CID 44559660	493	PMID: 12880321
CID 44560003	10.5	PMID: 11473417
CID 44566911	69.2	PMID: 14640528
CID 44566939	30.72	PMID: 14575443
CID 44567286	54.8	PMID: 20936791
CID 44567287	44.7	PMID: 20936791
CID 44567296	45.1	PMID: 20936791
CID 44567617	26.8	PMID: 18281952
CID 44567621	58.7	PMID: 18281952
CID 44567622	123.1	PMID: 18281952
CID 44575069	35.9	PMID: 19362850
CID 44575382	16.9	PMID: 15844957
CID 44575383	30	PMID: 15844957
CID 44575386	68	PMID: 15787435
CID 44575409	518	PMID: 15787452
CID 44575440	1000	PMID: 9599270
CID 44575735	260	PMID: 15620237
CID 44575749	18.3	PMID: 15568781
CID 44575750	49.7	PMID: 15568781
CID 44575752	47.1	PMID: 15568781
CID 44577121	284	PMID: 23356964
CID 44581360	100	PMID: 21504847
CID 44583433	530	PMID: 19464173
CID 44583434	450	PMID: 19464173
CID 44583461	510	PMID: 19464173
CID 44583925	61.8	PMID: 16933884
CID 44583938	45.72	PMID: 15921435
CID 44583939	124.82	PMID: 15921435
CID 44583980	30	PMID: 15844957
CID 44583983	30	PMID: 15844957
CID 44585556	49.9	PMID: 15568781
CID 445858	50.13	DOI: 10.1007/s00044-011-9713-2
CID 44587442	31.9	PMID: 21216503
CID 44590821	14.72	PMID: 19201199
CID 44593352	100	PMID: 12608850
CID 44593378	30	PMID: 15844957
CID 44594138	3.4	PMID: 21038854
CID 44632492	88	PMID: 20621727
CID 44632495	84.2	PMID: 20621727
CID 44634400	130.9	PMID: 20621727
CID 4465090	276	PMID: 24185379
CID 44715189	11.4	PMID: 22233425
CID 44715357	7.9	PMID: 23046341
CID 45101465	127.4	PMID: 19660956
CID 45101466	145.2	PMID: 19660956
CID 45101503	300	PMID: 19674906
CID 45101504	11	PMID: 19674906
CID 45267451	500	PMID: 19450986
CID 45267452	500	PMID: 19450986
CID 45267461	500	PMID: 19450986
CID 45267464	500	PMID: 19450986
CID 45268302	500	PMID: 19450986
CID 45268317	500	PMID: 19450986
CID 45269176	500	PMID: 19450986
CID 45269193	500	PMID: 19450986
CID 45269663	200	PMID: 19215141
CID 45269664	200	PMID: 19215141
CID 45269748	273.9	PMID: 19296617
CID 45269965	75.93	PMID: 19481947
CID 45270503	200	PMID: 19215141
CID 45271625	2.53	PMID: 19481947
CID 45271708	500	PMID: 19450986
CID 45271717	500	PMID: 19450986
CID 45271723	500	PMID: 19450986
CID 45272288	156.3	PMID: 19296617
CID 45273387	20.27	PMID: 19481947
CID 45278060	2300	PMID: 20036447
CID 45278061	4000	PMID: 20036447
CID 45278218	3000	PMID: 20036447
CID 45278379	3400	PMID: 20036447
CID 45278381	2800	PMID: 20036447
CID 45278382	3200	PMID: 20036447
CID 4534	6.2	PMID: 23117172
CID 45481544	31.4	PMID: 19007183
CID 45481545	71.4	PMID: 19007183
CID 45481546	41.5	PMID: 19007183
CID 45482317	90	PMID: 19007183
CID 45484290	1400	PMID: 19502068
CID 45484291	3500	PMID: 19502068
CID 45484292	2400	PMID: 19502068
CID 45484377	3170	PMID: 19502068
CID 45484392	110	PMID: 19502068
CID 45486328	39.67	PMID: 20038106
CID 45486330	45.67	PMID: 20038106
CID 46182908	1000	PMID: 20146504
CID 46182909	2500	PMID: 20146504
CID 46184559	37.6	PMID: 20121165
CID 46184560	34.1	PMID: 20121165
CID 46211198	35	PMID: 20230038
CID 46223916	8.4	PMID: 24499261
CID 46227124	300	PMID: 19674906
CID 46227125	300	PMID: 19674906
CID 46227137	300	PMID: 19674906
CID 46227138	300	PMID: 19674906
CID 46227139	38.3	PMID: 19674906
CID 46227181	300	PMID: 19674906
CID 46227186	300	PMID: 19674906
CID 46230189	200	PMID: 22209460
CID 46704104	81.5	PMID: 20332056
CID 46704106	118.8	PMID: 20332056
CID 467295	2.8	PMID: 22377672
CID 467296	10.8	PMID: 22377672
CID 46853900	60	PMID: 20452101
CID 46853901	60	PMID: 20452101
CID 46853902	7.7	PMID: 20452101
CID 46853903	60	PMID: 20452101
CID 46853904	60	PMID: 20452101
CID 46853907	60	PMID: 20452101
CID 46853908	60	PMID: 20452101
CID 46854056	60	PMID: 20452101
CID 46854057	60	PMID: 20452101
CID 46854059	60	PMID: 20452101
CID 46856003	6.8	PMID: 20452101
CID 46856146	3.9	PMID: 20452101
CID 46856147	60	PMID: 20452101
CID 46856148	60	PMID: 20452101
CID 46856153	60	PMID: 20452101
CID 46856154	60	PMID: 20452101
CID 46879766	10.5	PMID: 19848432
CID 46881100	3200	PMID: 20036447
CID 46883067	500	PMID: 19685913
CID 46886871	35	PMID: 20230038
CID 46890011	175.1	PMID: 22209460
CID 46911009	79.6	PMID: 20621727
CID 46911010	87.7	PMID: 20621727
CID 46918733	50	PMID: 20684529
CID 46918734	50	PMID: 20684529
CID 46918735	50	PMID: 20684529
CID 46919224	39.1	PMID: 20621497
CID 47576	324	PMID: 21174408
CID 484754	73.9	PMID: 22209460
CID 484757	165.3	PMID: 22209460
CID 4912	52.66	PMID: 15270574
CID 4947	46.1	PMID: 12350144
CID 49796926	10.71	PMID: 15780608
CID 49797993	61.6	PMID: 20621727
CID 49798007	96.2	PMID: 20621727
CID 49798008	87.3	PMID: 20621727
CID 49798009	87.4	PMID: 20621727
CID 49798010	88.5	PMID: 20621727
CID 49798011	163.8	PMID: 20621727
CID 49798034	102.5	PMID: 20621727
CID 49798035	112.9	PMID: 20621727
CID 49798036	222.9	PMID: 20621727
CID 49798037	202.5	PMID: 20621727
CID 49800188	64.4	PMID: 20825224
CID 49800189	68.4	PMID: 20825224
CID 49837276	45.1	PMID: 20936791
CID 49837277	49.7	PMID: 20936791
CID 49837278	56.9	PMID: 20936791
CID 49837279	51.6	PMID: 20936791
CID 49837380	61.5	PMID: 20936791
CID 49837381	61.5	PMID: 20936791
CID 49837382	63.2	PMID: 20936791
CID 49840039	4	PMID: 21038854
CID 49840040	3.5	PMID: 21038854
CID 49840041	100	PMID: 21038854
CID 49840042	4.5	PMID: 21038854
CID 49840043	9.1	PMID: 21038854
CID 49860105	4000	PMID: 19502068
CID 49862872	60	PMID: 20452101
CID 49863288	7.6	PMID: 20452101
CID 49866356	62.5	PMID: 20825224
CID 49866357	99.6	PMID: 20825224
CID 49866358	69.1	PMID: 20825224
CID 49866359	100	PMID: 20825224
CID 49866360	100	PMID: 20825224
CID 50899162	86	PMID: 21084196
CID 50899163	55	PMID: 21084196
CID 50899164	64	PMID: 21084196
CID 50899852	38.32	PMID: 21028890
CID 50899867	200	PMID: 20968296
CID 50901250	200	PMID: 20968296
CID 50901251	200	PMID: 20968296
CID 50901252	200	PMID: 20968296
CID 50908786	200	PMID: 20968296
CID 50994839	324	PMID: 21174408
CID 51040210	77.2	PMID: 21216503
CID 5113836	4000	PMID: 19502068
CID 513197	35.42	PMID: 23434138
CID 51354813	23.4	PMID: 21174408
CID 51991	60	PMID: 20452101
CID 5213	2100	PMID: 20036447
CID 5274585	37.2	PMID: 23356964
CID 5276405	7.52	PMID: 17693086
CID 5280343	39.7	PMID: 14640528
CID 5280443	100	PMID: 15081021
CID 5280445	10.4	PMID: 15081021
CID 5280536	64.6	PMID: 17448664
CID 5280804	17.9	PMID: 23266182
CID 5280805	12.34	PMID: 14575443
CID 5280863	89.7	PMID: 14640528
CID 5281426	400	PMID: 18835711
CID 5281600	184	PMID: 15787435
CID 5281607	100	PMID: 15081021
CID 5281697	24.04	PMID: 23131413
CID 5281703	100	PMID: 15081021
CID 5281708	1000	PMID: 18722771
CID 5281712	30.6	PMID: 14698182
CID 5281718	198	PMID: 9599270
CID 5281767	35.1	PMID: 22884407
CID 5281773	21	PMID: 16124783
CID 5281780	28.9	PMID: 23356964
CID 5281787	12.1	PMID: 23870700
CID 5282102	100	PMID: 21546250
CID 5282149	100	PMID: 22377672
CID 5282363	1.8	PMID: 21038854
CID 5284648	31.97	PMID: 21848266
CID 5284649	32.6	PMID: 18722771
CID 52918154	7.96	PMID: 21345672
CID 52942315	5.6	PMID: 21038854
CID 52942554	76	PMID: 21084196
CID 52943304	45	PMID: 21038854
CID 52943627	71	PMID: 21084196
CID 52946192	101	PMID: 21084196
CID 52947990	48.6	PMID: 20936791
CID 52949734	120	PMID: 21084196
CID 52949735	84	PMID: 21084196
CID 52949744	130	PMID: 21084196
CID 52953031	41.35	PMID: 21397369
CID 52953032	26.51	PMID: 21397369
CID 5296633	338.96	DOI: 10.1007/s00044-013-0586-4
CID 5315472	36.37	PMID: 15780608
CID 5315860	14	PMID: 17253844
CID 5316860	500	PMID: 15620237
CID 5317238	26.6	PMID: 23357310
CID 5317750	1000	PMID: 18722771
CID 5318156	88.3	PMID: 14510598
CID 5318457	17.74	PMID: 22079755
CID 5318606	28	PMID: 22377672
CID 5318767	100	PMID: 22377672
CID 5319258	35.02	PMID: 14575443
CID 5319895	62	PMID: 15787435
CID 5320237	38	PMID: 21216503
CID 5320256	117	PMID: 21216503
CID 5320623	25.31	PMID: 23177255
CID 53233246	18.52	PMID: 22079755
CID 5323504	765.6	PMID: 21028890
CID 5324476	21.36	PMID: 15780608
CID 53245951	15.4	PMID: 24080105
CID 53248678	100	PMID: 21546250
CID 5332132	200	PMID: 23711920
CID 53323306	466.07	PMID: 21028890
CID 53323677	16.4	PMID: 21174408
CID 53343162	200	DOI: 10.1007/s00044-011-9713-2
CID 53357198	5.4	PMID: 21658941
CID 53357199	3	PMID: 21658941
CID 53359033	1.4	PMID: 21658941
CID 53359041	140	PMID: 21429753
CID 53359042	76.8	PMID: 21429753
CID 5338977	94.3	PMID: 22832313
CID 5352090	30.99	PMID: 21028890
CID 5353737	15.4	PMID: 16203143
CID 5355326	1000	PMID: 22832313
CID 5355459	398.62	DOI: 10.1007/s00044-011-9648-7
CID 53600	415	PMID: 22280820
CID 5372945	63.5	PMID: 23282106
CID 5375964	1000	PMID: 22832313
CID 5375995	1000	PMID: 22832313
CID 5379302	100	DOI: 10.1007/s00044-010-9521-0
CID 5382849	11.8	PMID: 23357310
CID 5385357	24.3	PMID: 22832313
CID 5387718	60	PMID: 20452101
CID 5391130	200	PMID: 23711920
CID 5398322	27.4	PMID: 22832313
CID 5405609	117.44	DOI: 10.1007/s00044-011-9648-7
CID 5406133	1000	PMID: 22832313
CID 5406157	45.5	PMID: 15568781
CID 5411012	18.8	PMID: 22626550
CID 5424	9.37	PMID: 11929285
CID 542711	54	DOI: 10.1007/s00044-010-9384-4
CID 545076	2.43	PMID: 22626550
CID 54578042	7.83	PMID: 21843909
CID 54578253	6.19	PMID: 21843909
CID 54578254	6.3	PMID: 21843909
CID 54578255	5.8	PMID: 21843909
CID 54578256	5.8	PMID: 21843909
CID 54578257	6.71	PMID: 21843909
CID 54580412	76.3	PMID: 21429753
CID 54581338	18.5	PMID: 21341711
CID 54581732	100	PMID: 21546250
CID 54581933	40.43	PMID: 21504847
CID 54582362	7.5	PMID: 21341711
CID 54582856	46.05	PMID: 21504847
CID 54582857	48.64	PMID: 21504847
CID 54582882	36.72	PMID: 21504847
CID 54582883	44.65	PMID: 21504847
CID 54583865	42.18	PMID: 21504847
CID 54583887	100	PMID: 21504847
CID 54583888	100	PMID: 21504847
CID 54585255	18.6	PMID: 21341711
CID 54585601	100	PMID: 21546250
CID 54585769	45.48	PMID: 21504847
CID 54586593	100	PMID: 21546250
CID 54586595	100	PMID: 21546250
CID 54587609	100	PMID: 21546250
CID 54587807	38.87	PMID: 21504847
CID 5466139	21.5	PMID: 18722771
CID 54670067	43.81	PMID: 23206864
CID 5467476	13.27	DOI: 10.1007/s00044-010-9521-0
CID 5467589	60	PMID: 20452101
CID 5468010	60	PMID: 20452101
CID 54680783	160	PMID: 18281952
CID 5468263	14.81	DOI: 10.1007/s00044-010-9521-0
CID 54683773	200	PMID: 23869482
CID 5468519	13.2	PMID: 24080105
CID 54685921	58.8	PMID: 23869482
CID 547	26	PMID: 22385675
CID 54707106	2.39	DOI: 10.1007/s00044-010-9326-1
CID 5470829	74.96	DOI: 10.1007/s00044-010-9521-0
CID 54718836	11.1	PMID: 17387019
CID 5472258	1.13	PMID: 22626550
CID 5472392	17	PMID: 21718031
CID 54726150	2.15	DOI: 10.1007/s00044-010-9326-1
CID 54726724	18.7	PMID: 16488146
CID 54726789	14.1	PMID: 17387019
CID 54726790	11.1	PMID: 17387019
CID 54728156	2.81	DOI: 10.1007/s00044-010-9326-1
CID 54728157	2.29	DOI: 10.1007/s00044-010-9326-1
CID 5472867	500	PMID: 19359068
CID 54729516	45.5	PMID: 17448664
CID 54729517	52.5	PMID: 17448664
CID 54737530	7.5	PMID: 20708931
CID 54738770	2.23	DOI: 10.1007/s00044-010-9326-1
CID 54738771	2.07	DOI: 10.1007/s00044-010-9326-1
CID 54738772	2.25	DOI: 10.1007/s00044-010-9326-1
CID 54738773	3.21	DOI: 10.1007/s00044-010-9326-1
CID 54738873	181.8	PMID: 18835711
CID 54738874	201	PMID: 18835711
CID 54738875	202.1	PMID: 18835711
CID 54738876	129.9	PMID: 18835711
CID 54738877	97.8	PMID: 18835711
CID 54738878	161.4	PMID: 18835711
CID 54738879	157.7	PMID: 18835711
CID 54738880	165.9	PMID: 18835711
CID 5486199	84	PMID: 15165145
CID 5490884	10.2	PMID: 12608850
CID 5491408	3.5	PMID: 22377672
CID 54921573	200	DOI: 10.1007/s00044-011-9713-2
CID 5492482	30.1	PMID: 22377672
CID 5496206	60	PMID: 20452101
CID 5556829	2.5	PMID: 22626550
CID 5568494	0.93	PMID: 22626550
CID 56643424	11.61	PMID: 22071299
CID 56659422	3.5	PMID: 21658941
CID 56662883	8.3	PMID: 21658941
CID 56666367	7	PMID: 21658941
CID 56673257	5.1	PMID: 21658941
CID 56673269	8.6	PMID: 21658941
CID 56676587	2.1	PMID: 21658941
CID 56835101	47.99	PMID: 22079755
CID 56835118	45.57	PMID: 22079755
CID 56835119	18.8	PMID: 22079755
CID 56835120	18.59	PMID: 22079755
CID 56835121	13.06	PMID: 22079755
CID 56925680	165	PMID: 22145663
CID 56925681	2100	PMID: 22136576
CID 56925974	64.58	DOI: 10.1007/s00044-011-9713-2
CID 56925976	12.8	DOI: 10.1007/s00044-011-9713-2
CID 56928517	57.72	PMID: 21978674
CID 56928518	857.3	PMID: 21978674
CID 56928519	33.29	PMID: 21978674
CID 56928520	16.21	PMID: 21978674
CID 56928521	2408.14	PMID: 21978674
CID 56935668	50.64	DOI: 10.1007/s00044-010-9521-0
CID 56935777	100	DOI: 10.1007/s00044-010-9521-0
CID 56950653	66.7	PMID: 22209460
CID 56950654	89.1	PMID: 22209460
CID 5706863	117.67	PMID: 23206864
CID 5714231	2000	PMID: 24269515
CID 57333567	35.1	PMID: 22233425
CID 57381535	500	PMID: 22280820
CID 57381747	262	PMID: 22280820
CID 57381978	500	PMID: 22280820
CID 57384054	22	PMID: 22377672
CID 57384062	29.2	PMID: 22377672
CID 57391016	76.37	PMID: 21978674
CID 57391061	143000	PMID: 22385675
CID 57391062	82000	PMID: 22385675
CID 57392787	1608.25	PMID: 21978674
CID 57392855	26000	PMID: 22385675
CID 57392856	20000	PMID: 22385675
CID 57393076	7.7	PMID: 22377672
CID 57394535	314.56	PMID: 21978674
CID 57394578	148000	PMID: 22385675
CID 57394579	150000	PMID: 22385675
CID 57394580	44000	PMID: 22385675
CID 57394581	32000	PMID: 22385675
CID 57396283	6.91	PMID: 21978674
CID 57396328	25000	PMID: 22385675
CID 57396329	48000	PMID: 22385675
CID 57396330	23000	PMID: 22385675
CID 57396559	26.4	PMID: 22377672
CID 57397242	200	PMID: 22071299
CID 57399736	1346.75	PMID: 21978674
CID 57399779	22000	PMID: 22385675
CID 57400005	31.9	PMID: 22377672
CID 57401501	1288.1	PMID: 21978674
CID 57401502	36.63	PMID: 21978674
CID 57401553	29000	PMID: 22385675
CID 57401809	19.8	PMID: 22377672
CID 57402423	19.78	PMID: 22071299
CID 57403253	10.51	PMID: 21978674
CID 57403299	84000	PMID: 22385675
CID 57403300	76000	PMID: 22385675
CID 57403301	185000	PMID: 22385675
CID 57403883	68000	PMID: 22385675
CID 5742590	30	PMID: 15844957
CID 5746	200	PMID: 20968296
CID 5750975	2.49	PMID: 17197183
CID 5829201	37.8	PMID: 24269515
CID 5852	16.9	PMID: 15844957
CID 58652864	11.3	PMID: 24080105
CID 5910817	12.5	PMID: 24080105
CID 5919576	15.3	PMID: 24080105
CID 5922182	11.9	PMID: 24080105
CID 60148498	14.5	PMID: 22642365
CID 60150388	99.7	PMID: 22503365
CID 60201982	231.1	DOI: 10.1007/s00044-010-9384-4
CID 60201983	43.1	DOI: 10.1007/s00044-010-9384-4
CID 60201984	214.7	DOI: 10.1007/s00044-010-9384-4
CID 60201985	42.2	DOI: 10.1007/s00044-010-9384-4
CID 6072	1488.9	PMID: 23266182
CID 608903	769.35	DOI: 10.1007/s00044-013-0586-4
CID 6112	400	PMID: 11708933
CID 6175	30	PMID: 15844957
CID 6219085	2000	PMID: 24269515
CID 623407	129.5	DOI: 10.1007/s00044-010-9384-4
CID 6246186	143.32	DOI: 10.1007/s00044-011-9648-7
CID 6251	30	PMID: 15844957
CID 6287824	406.93	DOI: 10.1007/s00044-011-9648-7
CID 6325664	30	PMID: 15844957
CID 636721	10.39	PMID: 12027755
CID 636767	57	PMID: 12027772
CID 637775	25.7	PMID: 18314960
CID 639465	14	PMID: 15974621
CID 640096	25.2	PMID: 19481947
CID 6437306	500	PMID: 19359068
CID 6438495	200	PMID: 17196384
CID 6439175	10.1	PMID: 17196384
CID 6441059	23	PMID: 16562825
CID 6449879	12	PMID: 16562825
CID 6449880	21	PMID: 16562825
CID 6454254	8.8	PMID: 20452101
CID 6474310	32.4	PMID: 23356964
CID 6474788	43.8	PMID: 22377672
CID 6474893	257.35	PMID: 19359068
CID 6474901	12.7	PMID: 23726032
CID 6476333	20	PMID: 16124783
CID 6477524	2.3	PMID: 23357628
CID 6481477	1000	PMID: 9599270
CID 6488369	159.83	PMID: 23206864
CID 65017687	200	PMID: 23711920
CID 65017744	200	PMID: 23711920
CID 65017829	200	PMID: 23711920
CID 65017831	200	PMID: 23711920
CID 65017911	200	PMID: 23711920
CID 65018060	200	PMID: 23711920
CID 65064	8.3	PMID: 22377672
CID 6507117	100	PMID: 17967537
CID 6508134	794.4	PMID: 24269515
CID 65090	69.6	PMID: 20332056
CID 65126	53.3	PMID: 12350144
CID 6515627	2000	PMID: 24269515
CID 6518793	2000	PMID: 24269515
CID 66491	149.4	DOI: 10.1007/s00044-010-9384-4
CID 66555132	0.44	PMID: 22626550
CID 667490	65	PMID: 19692149
CID 667639	28	PMID: 9599270
CID 6693	1773.8	DOI: 10.1007/s00044-010-9384-4
CID 674723	59.41	DOI: 10.1007/s00044-011-9648-7
CID 676166	180	PMID: 19692149
CID 676946	200	DOI: 10.1007/s00044-011-9713-2
CID 677307	43.9	PMID: 24269515
CID 677493	500	PMID: 22280820
CID 679479	49.2	PMID: 23117172
CID 68051	25	PMID: 19476340
CID 68213	5.3	PMID: 12932126
CID 689038	35.1	PMID: 19481947
CID 689043	31.7	PMID: 16488146
CID 689075	21.3	PMID: 24080105
CID 689111	12.25	PMID: 19481947
CID 68976271	61.2	PMID: 23282106
CID 693366	70	PMID: 24185379
CID 69495826	200	PMID: 23711920
CID 696323	805	PMID: 24185379
CID 697993	92	PMID: 19502068
CID 6997502	23.49	PMID: 17197183
CID 701011	265	PMID: 24185379
CID 702382	114	PMID: 24185379
CID 7060852	91	PMID: 19502068
CID 70681231	830.9	PMID: 22503365
CID 70681748	62.4	PMID: 23282106
CID 70682461	70	PMID: 22884407
CID 70682462	70	PMID: 22884407
CID 70682701	461.4	PMID: 22917856
CID 70682702	8.9	PMID: 22917856
CID 70684459	24.9	PMID: 22832313
CID 70684548	70	PMID: 22884407
CID 70684787	224.8	PMID: 22917856
CID 70686688	43.2	PMID: 22884407
CID 70686689	60.3	PMID: 22884407
CID 70686690	70	PMID: 22884407
CID 70686691	70	PMID: 22884407
CID 70686692	70	PMID: 22884407
CID 70686938	104.6	PMID: 22917856
CID 70688789	70	PMID: 22884407
CID 70688790	70	PMID: 22884407
CID 70689075	34.46	PMID: 22626550
CID 70690869	70	PMID: 22884407
CID 70691116	120.8	PMID: 22917856
CID 70692466	500	PMID: 22652051
CID 70692919	413.4	PMID: 22832313
CID 70693290	5.22	PMID: 22626550
CID 70694509	500	PMID: 22652051
CID 70695319	529.1	PMID: 22917856
CID 70695320	139.5	PMID: 22917856
CID 70697009	14.1	PMID: 24269515
CID 70697096	70	PMID: 22884407
CID 70697334	114.3	PMID: 22917856
CID 709477	147.1	DOI: 10.1007/s00044-010-9384-4
CID 71450402	30.89	PMID: 23131413
CID 71450618	144	PMID: 23116886
CID 71450619	14.2	PMID: 23116886
CID 71450620	40	PMID: 23116886
CID 71451207	4.7	PMID: 22981331
CID 71452228	32.7	PMID: 23131413
CID 71452459	103	PMID: 23116886
CID 71452460	110	PMID: 23116886
CID 71452461	14.8	PMID: 23116886
CID 71452462	32	PMID: 23116886
CID 71454039	32.47	PMID: 23131413
CID 71454322	21.2	PMID: 23117172
CID 71454766	10.4	PMID: 22981331
CID 71455973	76	PMID: 23116886
CID 71455974	15.6	PMID: 23116886
CID 71456071	250	PMID: 23117172
CID 71456537	4.8	PMID: 22981331
CID 71457557	30.08	PMID: 23131413
CID 71458388	11.1	PMID: 22981331
CID 71459447	32.44	PMID: 23131413
CID 71459693	133	PMID: 23116886
CID 71461188	24.96	PMID: 23131413
CID 71461406	10.8	PMID: 23116886
CID 71461407	10	PMID: 23116886
CID 71461504	90	PMID: 23117172
CID 71461505	15.9	PMID: 23117172
CID 71461948	14.1	PMID: 22981331
CID 71461949	9.7	PMID: 22981331
CID 71462931	26.46	PMID: 23131413
CID 71463139	141	PMID: 23116886
CID 71463140	28	PMID: 23116886
CID 71508434	31.5	PMID: 23177727
CID 71508435	21.8	PMID: 23177727
CID 71508436	29.3	PMID: 23177727
CID 71508437	44.8	PMID: 23177727
CID 71508485	41.5	PMID: 23177727
CID 71508486	43	PMID: 23177727
CID 71508487	50	PMID: 23177727
CID 71508488	50	PMID: 23177727
CID 71508489	50	PMID: 23177727
CID 71508529	21.09	PMID: 23177727
CID 71508530	15.6	PMID: 23177727
CID 71508531	19.3	PMID: 23177727
CID 71517036	108.97	PMID: 23206864
CID 71517037	190.24	PMID: 23206864
CID 71517041	729.32	PMID: 23206864
CID 71517042	641.02	PMID: 23206864
CID 71517043	1662.8	PMID: 23206864
CID 71517188	170.14	PMID: 23206864
CID 71519336	63.24	PMID: 23206864
CID 71519486	497.61	PMID: 23206864
CID 71519487	22.76	PMID: 23206864
CID 71519488	26.16	PMID: 23206864
CID 71519489	92.1	PMID: 23206864
CID 71519490	88.54	PMID: 23206864
CID 71519491	76.5	PMID: 23206864
CID 71519492	62.41	PMID: 23206864
CID 71521886	49.8	PMID: 23282106
CID 71521887	48.2	PMID: 23282106
CID 71523993	9720	PMID: 23266182
CID 71523994	901.8	PMID: 23266182
CID 71523995	2873.6	PMID: 23266182
CID 71523997	38.2	PMID: 23266182
CID 71523998	60.4	PMID: 23266182
CID 71523999	97.9	PMID: 23266182
CID 71524305	55.2	PMID: 23282106
CID 71524306	54.1	PMID: 23282106
CID 71524307	57.1	PMID: 23282106
CID 71524308	64.7	PMID: 23282106
CID 71524309	65.2	PMID: 23282106
CID 71524310	67	PMID: 23282106
CID 71560190	18.6	PMID: 23357628
CID 71560297	1.7	PMID: 23357628
CID 71560298	2.3	PMID: 23357628
CID 71560299	1.8	PMID: 23357628
CID 71560300	4.8	PMID: 23357628
CID 71560301	2	PMID: 23357628
CID 71575067	182	PMID: 23291121
CID 71575068	276	PMID: 23291121
CID 71575069	300	PMID: 23291121
CID 71575158	206	PMID: 23291121
CID 71575159	300	PMID: 23291121
CID 71575160	270	PMID: 23291121
CID 71575161	197	PMID: 23291121
CID 71575162	283	PMID: 23291121
CID 71584322	20.44	PMID: 23434138
CID 71607789	108	PMID: 23291121
CID 71607792	56	PMID: 23291121
CID 71681084	200	PMID: 23711920
CID 71681085	200	PMID: 23711920
CID 71681086	200	PMID: 23711920
CID 71681235	200	PMID: 23711920
CID 71681236	200	PMID: 23711920
CID 71681237	200	PMID: 23711920
CID 71681388	200	PMID: 23711920
CID 71681390	200	PMID: 23711920
CID 71681703	11.1	PMID: 23726032
CID 71681704	13.2	PMID: 23726032
CID 71681705	14	PMID: 23726032
CID 71681706	12.1	PMID: 23726032
CID 71699120	25.8	PMID: 23644206
CID 71699189	26.1	PMID: 23644206
CID 71699190	16.4	PMID: 23644206
CID 71699191	35.8	PMID: 23644206
CID 71699192	66.5	PMID: 23644206
CID 71699193	46.9	PMID: 23644206
CID 71699278	26.2	PMID: 23644206
CID 71699279	41	PMID: 23644206
CID 71716107	34.86	PMID: 23177255
CID 71716160	5265.3	PMID: 23266182
CID 71716716	3347.31	PMID: 23206864
CID 71716780	146.5	PMID: 23266182
CID 71717069	87.37	PMID: 23434138
CID 71717382	36.95	PMID: 23266182
CID 71717383	1688.8	PMID: 23266182
CID 71717505	71	PMID: 23291121
CID 71717679	57.4	PMID: 23356964
CID 71717915	2847.26	PMID: 23206864
CID 71717916	3580.86	PMID: 23206864
CID 71718307	0.23	PMID: 23434138
CID 71718538	159.83	PMID: 23206864
CID 71719135	1285.54	PMID: 23206864
CID 71719148	28.42	PMID: 23177255
CID 71719203	1907.7	PMID: 23266182
CID 71719321	75	PMID: 23291121
CID 71719510	46.5	PMID: 23282106
CID 71719813	42	PMID: 23266182
CID 71720360	265.53	PMID: 23206864
CID 71769550	10.1	PMID: 23870700
CID 71769551	9.1	PMID: 23870700
CID 71769552	7	PMID: 23870700
CID 71769553	8.3	PMID: 23870700
CID 71769554	7.8	PMID: 23870700
CID 71769683	7.2	PMID: 23870700
CID 71769684	8.3	PMID: 23870700
CID 71769685	10.7	PMID: 23870700
CID 71769686	11.2	PMID: 23870700
CID 71769687	8.3	PMID: 23870700
CID 71769688	6.8	PMID: 23870700
CID 7192	4000	PMID: 19502068
CID 719344	46	PMID: 19502068
CID 72	27	PMID: 16908141
CID 72185	18	PMID: 19007183
CID 72186	32.1	PMID: 19007183
CID 72192259	200	PMID: 23869482
CID 72192260	95.9	PMID: 23869482
CID 72192261	88.7	PMID: 23869482
CID 72192262	95.3	PMID: 23869482
CID 72192263	200	PMID: 23869482
CID 72204382	32.63	PMID: 23993673
CID 72204383	37.29	PMID: 23993673
CID 72204384	35.56	PMID: 23993673
CID 72204385	29.27	PMID: 23993673
CID 72204386	21.8	PMID: 23993673
CID 72204387	19.62	PMID: 23993673
CID 72204575	68.26	PMID: 23993673
CID 72204576	35.52	PMID: 23993673
CID 72204577	89.3	PMID: 23993673
CID 72204578	30.5	PMID: 23993673
CID 72204579	22.77	PMID: 23993673
CID 72204580	31.3	PMID: 23993673
CID 72204581	43.45	PMID: 23993673
CID 72204684	81	PMID: 23807113
CID 72204771	35.06	PMID: 23993673
CID 72204772	36.21	PMID: 23993673
CID 72204773	36.06	PMID: 23993673
CID 72204774	50.96	PMID: 23993673
CID 72204775	71.29	PMID: 23993673
CID 72204776	35.92	PMID: 23993673
CID 72204777	47.82	PMID: 23993673
CID 72204868	134	PMID: 23807113
CID 72204870	102	PMID: 23807113
CID 72204950	38.31	PMID: 23993673
CID 72204951	47.82	PMID: 23993673
CID 72204952	83.35	PMID: 23993673
CID 72204953	36.3	PMID: 23993673
CID 72204954	25.17	PMID: 23993673
CID 72204955	28.64	PMID: 23993673
CID 72204956	31.75	PMID: 23993673
CID 72205134	22.4	PMID: 23993673
CID 72205135	94.4	PMID: 23993673
CID 72205136	107.57	PMID: 23993673
CID 72206548	110	PMID: 23811091
CID 72276	49	PMID: 14640528
CID 72277	16.2	PMID: 22377672
CID 72545288	78.8	PMID: 24157368
CID 72545289	98.4	PMID: 24157368
CID 72545290	75.2	PMID: 24157368
CID 72545531	98.3	PMID: 24157368
CID 72545532	95.4	PMID: 24157368
CID 72545533	78.3	PMID: 24157368
CID 72545534	45.4	PMID: 24157368
CID 72545535	44.6	PMID: 24157368
CID 72545536	75.5	PMID: 24157368
CID 72545537	64.5	PMID: 24157368
CID 72545538	52.3	PMID: 24157368
CID 72545788	45	PMID: 24157368
CID 72545789	56.3	PMID: 24157368
CID 72696877	12.8	PMID: 24080105
CID 72697012	17.4	PMID: 24080105
CID 72697013	18.5	PMID: 24080105
CID 72707526	160	PMID: 23973822
CID 72707527	180	PMID: 23973822
CID 72707589	480	PMID: 23973822
CID 72707591	150	PMID: 23973822
CID 72707592	190	PMID: 23973822
CID 72707593	540	PMID: 23973822
CID 72707595	1270	PMID: 23973822
CID 72707658	1150	PMID: 23973822
CID 72707659	570	PMID: 23973822
CID 72707660	890	PMID: 23973822
CID 72707661	2630	PMID: 23973822
CID 72707662	480	PMID: 23973822
CID 72707663	940	PMID: 23973822
CID 72707736	930	PMID: 23973822
CID 72707737	720	PMID: 23973822
CID 72707738	750	PMID: 23973822
CID 72707739	460	PMID: 23973822
CID 728148	769	PMID: 24185379
CID 72947660	1.5	PMID: 24342238
CID 72947661	15.1	PMID: 24342238
CID 72947662	29.9	PMID: 24342238
CID 72947663	24.1	PMID: 24342238
CID 72947664	4	PMID: 24342238
CID 72947665	18.7	PMID: 24342238
CID 72947666	11.1	PMID: 24342238
CID 72947870	1.6	PMID: 24342238
CID 73345791	31.54	PMID: 23603045
CID 73348975	200	PMID: 23711920
CID 73353516	20.5	PMID: 23644206
CID 73354904	9.04	PMID: 23603045
CID 73426406	17.3	DOI: 10.1007/s00044-013-0506-7
CID 735254	89.78	PMID: 23993673
CID 736681	150.02	DOI: 10.1007/s00044-011-9713-2
CID 73891091	8.4	PMID: 24387661
CID 7428	7.2	PMID: 16713262
CID 745079	200	PMID: 23711920
CID 76307974	61.9	DOI: 10.1007/s00044-010-9384-4
CID 76307975	165.6	DOI: 10.1007/s00044-010-9384-4
CID 76307996	52.35	DOI: 10.1007/s00044-011-9713-2
CID 76308451	320	DOI: 10.1007/s00044-010-9474-3
CID 76308955	61.65	DOI: 10.1007/s00044-012-0247-z
CID 76309032	566.53	DOI: 10.1007/s00044-013-0586-4
CID 76310270	18.8	PMID: 24499261
CID 76311591	200	DOI: 10.1007/s00044-011-9713-2
CID 76311603	100	DOI: 10.1007/s00044-010-9521-0
CID 76315102	2.39	DOI: 10.1007/s00044-010-9326-1
CID 76315134	209.9	DOI: 10.1007/s00044-010-9384-4
CID 76316150	40.76	DOI: 10.1007/s00044-012-0247-z
CID 76316151	66.77	DOI: 10.1007/s00044-012-0247-z
CID 76316152	100	DOI: 10.1007/s00044-012-0247-z
CID 76317396	14.9	PMID: 24387661
CID 76317397	34.7	PMID: 24387661
CID 76317496	19.6	PMID: 24499261
CID 76317497	298	PMID: 24499304
CID 76318807	87.24	DOI: 10.1007/s00044-011-9713-2
CID 76319333	85	DOI: 10.1007/s00044-010-9474-3
CID 763204	200	PMID: 23711920
CID 76320422	310.9	DOI: 10.1007/s00044-013-0506-7
CID 76320423	668.7	DOI: 10.1007/s00044-013-0506-7
CID 76322444	221.3	DOI: 10.1007/s00044-010-9384-4
CID 76322445	208.1	DOI: 10.1007/s00044-010-9384-4
CID 76322482	20.71	DOI: 10.1007/s00044-010-9521-0
CID 76322986	270	DOI: 10.1007/s00044-010-9474-3
CID 76323583	440.22	DOI: 10.1007/s00044-013-0586-4
CID 76324847	34.6	PMID: 24499261
CID 76326917	30.6	PMID: 11929285
CID 76327084	38.05	DOI: 10.1007/s00044-012-0247-z
CID 76327085	100	DOI: 10.1007/s00044-012-0247-z
CID 76327613	357.3	DOI: 10.1007/s00044-013-0506-7
CID 76328405	569	PMID: 24499304
CID 76329384	300	DOI: 10.1039/C3MD00213F
CID 76329677	100	DOI: 10.1007/s00044-010-9521-0
CID 76330748	100	DOI: 10.1007/s00044-012-0247-z
CID 76330749	100	DOI: 10.1007/s00044-012-0247-z
CID 76333313	205.9	DOI: 10.1007/s00044-010-9384-4
CID 76333336	1.45	DOI: 10.1007/s00044-011-9713-2
CID 76333822	163	DOI: 10.1007/s00044-010-9474-3
CID 76334179	53.2	PMID: 11929285
CID 76334341	70.14	DOI: 10.1007/s00044-012-0247-z
CID 76334342	87.5	DOI: 10.1007/s00044-012-0247-z
CID 76334343	35.85	DOI: 10.1007/s00044-012-0247-z
CID 76334871	620.7	DOI: 10.1007/s00044-013-0506-7
CID 76334872	599.3	DOI: 10.1007/s00044-013-0506-7
CID 76335691	2000	PMID: 24499304
CID 76335692	2000	PMID: 24499304
CID 76956	1280000	PMID: 22385675
CID 779368	292.38	PMID: 20828889
CID 802112	200	PMID: 23711920
CID 804849	1.35	PMID: 19481947
CID 832914	27	PMID: 24185379
CID 84298	30	PMID: 15844957
CID 8456	79.16	PMID: 18986201
CID 85405	20.3	PMID: 18088100
CID 868511	23.1	PMID: 22832313
CID 870018	4000	PMID: 19502068
CID 8706	4000	PMID: 19502068
CID 8768	29.4	PMID: 16908141
CID 87935	320.1	DOI: 10.1007/s00044-010-9384-4
CID 881405	30.7	PMID: 24185379
CID 8833050	100	DOI: 10.1007/s00044-010-9521-0
CID 8858391	46	PMID: 17448664
CID 9064	20.2	PMID: 14698182
CID 913709	1000	PMID: 22832313
CID 92097	500	PMID: 15620237
CID 92267	324	PMID: 21174408
CID 923087	240	PMID: 24185379
CID 92525	14	PMID: 17602526
CID 932036	41.3	PMID: 24269515
CID 932147	1000	PMID: 22832313
CID 954313	4000	PMID: 19502068
CID 961456	1000	PMID: 22832313
CID 97696	2.7	PMID: 20452101
CID 9813852	22.77	PMID: 19481947
CID 9817274	35	PMID: 17967537
CID 9826353	32000	PMID: 22385675
CID 9831710	3600	PMID: 20036447
CID 9878547	200	PMID: 19375195
CID 9880352	200	PMID: 19375195
CID 9881652	57	PMID: 19666224
CID 9938674	53	PMID: 15787435
CID 99622	116.5	PMID: 22079755
CID 9972469	51.2	PMID: 14698182
CID 9973595	34.3	PMID: 12182869
CID 9976853	7.5	PMID: 11141124
CID 9991705	12.6	PMID: 24080105
CID 9994897	47.6	PMID: 23282106
CID 9996305	103	PMID: 17896816
